REVIEW ARTICLES

**Complications of non-invasive ventilation techniques: a comprehensive qualitative review of randomized trials**

M. Carron<sup>1</sup>, U. Freo<sup>1\*</sup>, A. S. BaHammam<sup>2</sup>, D. Dellweg<sup>3</sup>, F. Guarracino<sup>4</sup>, R. Cosentini<sup>5</sup>, P. Feltracco<sup>1</sup>, A. Vianello<sup>6</sup>, C. Ori<sup>1</sup> and A. Esquinas<sup>7</sup>

<sup>1</sup> Department of Pharmacology and Anesthesiology, University of Padua, Padua, Italy

<sup>2</sup> Sleep Disorders Center, College of Medicine, King Saud University, Riyadh, Saudi Arabia

<sup>3</sup> Fachkrankenhaus Kloster Grafschaft, Annostrasse 1, 57392 Schmallenberg, NRW, Germany

<sup>4</sup> Cardiothoracic Anaesthesia and Intensive Care Medicine, University Hospital of Pisa, Pisa, Italy

<sup>5</sup> NIV Group, Emergency Medicine Department - Fondazione IRCCS Ca' Granda Policlinico - Milan, Italy

<sup>6</sup> Respiratory Pathophysiology Unit, City Hospital of Padova, Padova, Italy

<sup>7</sup> Intensive Care Unit, Hospital Morales Meseguer, Spain

\* Corresponding author. E-mail: ulderico.freo@unipd.it

**Editor's key points**

- The authors provide a comprehensive review of all possible complications associated with non-invasive ventilation.
- Serious complications such as pneumonia, barotrauma, and haemodynamic compromise are discussed.
- Many less serious complications have also been described.
- Importantly, knowledge of these complications should encourage careful selection of the patients, equipment, and monitoring techniques.

**Summary.** Non-invasive ventilation (NIV) has become a common treatment for acute and chronic respiratory failure. In comparison with conventional invasive mechanical ventilation, NIV has the advantages of reducing patient discomfort, procedural complications, and mortality. However, NIV is associated with frequent uncomfortable or even life-threatening adverse effects, and patients should be thoroughly screened beforehand to reduce potential severe complications. We performed a detailed review of the relevant medical literature for NIV complications. All major NIV complications are potentially life-threatening and can occur in any patient, but are strongly correlated with the degree of pulmonary and cardiovascular involvement. Minor complications can be related to specific structural features of NIV interfaces or to variable airflow patterns. This extensive review of the literature shows that careful selection of patients and interfaces, proper setting of ventilator modalities, and close monitoring of patients from the start can greatly reduce NIV complications.

**Keywords:** complications; non-invasive ventilation; respiratory; ventilation

Over the last two decades, non-invasive ventilation (NIV) has become the standard of care in treating acute respiratory failure (ARF).<sup>1–8</sup> Several randomized controlled trials (RCTs) have shown that NIV improves dyspnoea and gas exchange and reduces the incidence of tracheal intubation. Compared with invasive mechanical ventilation (IMV), NIV reduces the length of intensive care unit (ICU) and hospital stay, morbidity, and mortality in patients with acute and chronic respiratory failure.<sup>9–71</sup> As NIV efficacy varies depending on the severity and type of respiratory pathology, patient selection must be based on failure predictors to reduce the risk of dangerous NIV failures.

Although NIV is well tolerated by most patients, it is not entirely free from serious adverse side-effects and complications. The safety of NIV can be enhanced by a greater awareness of complication predictive factors and afterward by prompt recognition and treatment of untoward occurrences.<sup>1–8</sup> To our knowledge, no review has been published on possible risks

and side-effects associated with NIV. Our objective was to comprehensively review the published literature on the pathophysiology and the management of complications associated with NIV. Major complications are those that are potentially life-threatening or lead to increased morbidity. Minor complications are defined as mild or transient medical problems related to features specific to NIV, such as interfaces or gas flow.

**Methods**

**Search method**

RCTs and observational and case report studies describing complications were considered for the qualitative review. Inclusion criteria for report selection for quantitative meta-analysis were: (i) complete, published RCT on NIV vs either oxygen delivery by the mask without ventilatory support or IMV, written in English; (ii) patients studied were all adults (i.e.  $\geq 18$  yr old); and (iii) studies were performed

in a clinical, and not experimental, setting. Exclusion criteria were irrelevance or paediatric studies, lack of data or full text for meta-analysis, or lack of complication report for qualitative description.

Two authors (M.C., U.F.) independently evaluated title, abstract, and, when available, the full manuscripts of all eligible studies and performed data extraction using a data collection form. Discrepancies were examined by the two investigators. If an agreement could not be reached between two investigators, the decision was made by a third investigator (C.O.).

We searched for publications on 'NIV' in the PubMed, Embase, Web of Science, and Cochrane Library electronic databases (from January 1990 to August 2012) and retrieved a total of 2823 reports. Reports were screened for relevance and for methodological soundness (Fig. 1). In order to improve search accuracy, we ran another search using the words 'noninvasive ventilation' combined with the terms 'skin lesion, noise, leaks, airway lesions, gas exchange alteration, pulmonary complications, haemodynamic effects, intolerance, discomfort, mechanical complications' using the 'AND' function. Finally, we searched the reference lists of previously published systematic reviews for any missing articles.

### Statistical analyses

To determine the relative risk (RR) of an event (i.e. NIV failure or NIV-related complication), RCT data were assessed for RR with 95% confidence interval (95% CI) and *P*-value using MedCalc version 12.3 (MedCalc Software, Mariakerke, Belgium).

Selected papers were also subgrouped depending upon the primary underlying acute respiratory failure (ARF) reason for NIV administration [e.g. chronic obstructive pulmonary disease (COPD), acute cardiac pulmonary oedema (ACPO), and hypoxic ARF, hypoxic-hypercapnic ARF, postoperative ARF, post-extubation ARF, and weaning]. For meta-analyses investigating failure and pneumonia rates, only studies that directly compared NIV with standard medical therapy (i.e. oxygen delivered through a mask without ventilator support) were included. For meta-analyses of weaning studies, only studies that directly compared NIV with the conventional weaning approach (i.e. support ventilation provided through a tracheal tube) were included. No meta-analyses were performed to study haemodynamic or barotrauma effects of NIV, as there were insufficient data available in the literature.

For meta-analyses, data including incidence of complications, NIV interfaces and NIV technique, and sample sizes were extracted from trials and imported into the statistical software program Comprehensive Meta Analysis Version 2.0 for Windows (Biostat Inc., Englewood, NJ, USA). The data imported were dichotomous data (number of events) and sample size for each study of different ARF subgroups. The program showed the odds ratio (and 95% CI), *z*-value, *P*-value, and the relative weight assigned for each study. We visually assessed statistical heterogeneity by examining the forest plots and quantified heterogeneity using the  $I^2$  statistic. An  $I^2$  value of >50% was considered to indicate substantial

heterogeneity. In all cases, *P*-values of <0.05 were considered indicative of statistical significance between groups.

## Results

### Paper selection

Of 2823 reports on NIV initially identified in the literature, 1967 records were excluded because they were not relevant to the review; a further 702 reports were excluded because they were short (i.e. abstract or letter), or not reporting on complication, or reporting on paediatric subjects. One hundred and fifty-four articles were selected and used in the qualitative review. Sixty-two RCTs including a total of 5870 patients were included for subsequent meta-analyses (Table 1). A schematic of our study selection protocol is presented in Figure 1.

Tables 2–4 detail the relative incidences of diverse NIV failure causes determined from our literature search and of major and minor complications related to NIV. Suggestions for clinical interventions to prevent and deal with complications are included as well.

### NIV failure

After assessing the RCTs (NIV vs standard medical care), the overall NIV failure occurred in 16.3% (360/2198) of patients and failure for all causes had a small but significant RR of 0.88 (95% CI: 0.85–0.91; *P*<0.0001, not shown) (Table 2). Our meta-analysis categorized NIV failure causes according to underlying disease states (Fig. 2). Although NIV was associated with markedly lower mean failure ORs vs standard therapy in COPD (RR 0.71, CI: 0.71–0.87, *P*<0.0001), hypoxic ARF (RR 0.86, CI: 0.79–0.93, *P*=0.0004), hypoxic-hypercapnic ARF (RR 0.84, CI: 0.75–0.94, *P*=0.0025), and postoperative ARF (RR 0.92, CI: 0.88–0.96, *P*=0.0009), the statistical significance of these differences was not maintained after completion of and meta-analysis (Fig. 2).

### Pneumonia

Overall NIV-associated pneumonia occurred in 5.7% (67/1172) of patients (not shown). Our meta-analysis of pneumonia incidence in NIV vs standard medical care showed no clear statistical association between NIV treatment and pneumonia in diverse medical conditions (Fig. 3). Nonetheless, pneumonia incidence comparing NIV vs standard medical care for all causes had a small but significant RR of 0.92 (95% CI: 0.89–0.94; *P*<0.0001, not shown). In particular, NIV was associated with markedly lower mean pneumonia ORs vs standard therapy for failure in hypoxic ARF (RR 0.89, CI: 0.82–0.95, *P*=0.0025) and postoperative ARF (RR 0.94, CI: 0.90–0.98, *P*=0.011), which may display significance in the future when additional studies are available for meta-analysis. In contrast, when NIV was compared with tracheal intubation for ventilator support weaning, NIV showed a significant risk reduction in pneumonia incidence (RR 0.79; 95% CI 0.71–0.88, *P*<0.0001), by meta-analysis of five relevant RCTs (Fig. 3). This suggests that NIV may be superior to typical approaches for weaning patients off ventilator support.

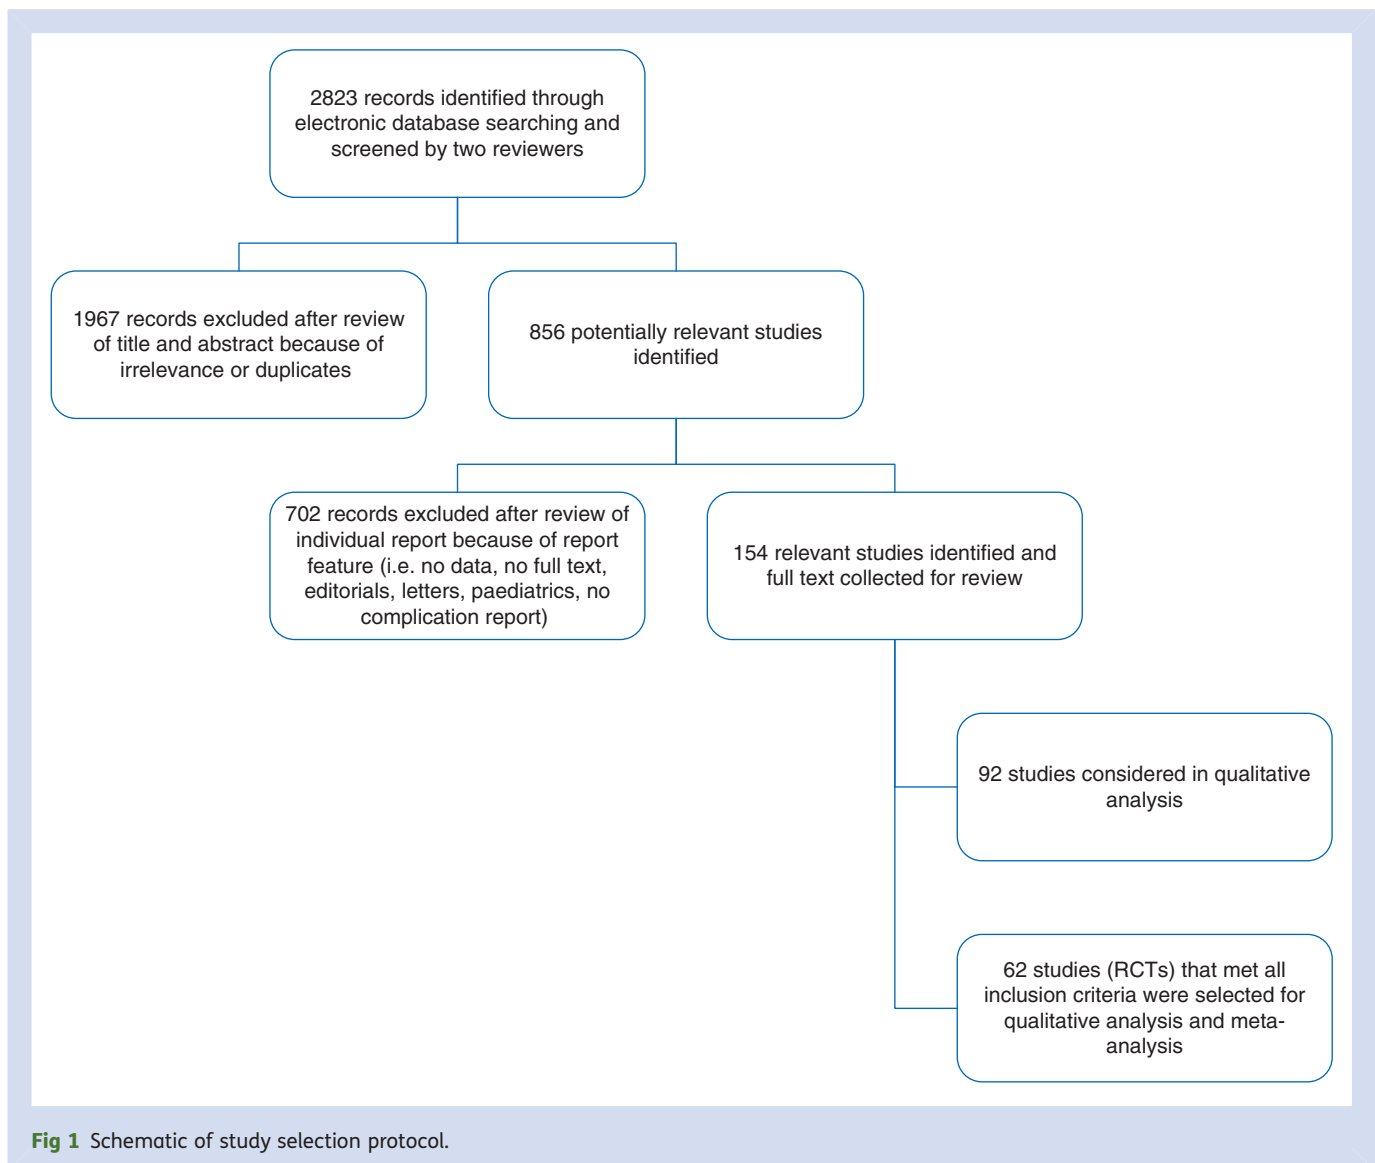

### Other complications

All other complications ranged from 0% to 100% (Table 3). The literature did not provide sufficient data to conduct a meta-analysis on haemodynamic complications during NIV (Table 2).

Compared with standard medical care, NIV had a small but significant RR for intolerance (RR 0.91; 95% CI: 0.88–0.93;  $P < 0.0001$ ), nasal lesions (RR 0.87; 95% CI: 0.84–0.90;  $P < 0.0001$ ), nasal/oral dryness/congestion (RR 0.93; 95% CI: 0.89–0.97;  $P = 0.0025$ ), and gastric insufflation (RR 0.96; 95% CI: 0.94–0.98;  $P = 0.0008$ ).

## Discussion

### NIV failure

The number of patients treatable with NIV is large and likely to increase in the near future because of positive evidence from ongoing investigations. However, the inability to relieve dyspnoea and improve gas exchange still remains the most important evidence of NIV failure, especially in

the least investigated conditions (Table 1). NIV failure depends on several factors such as delayed NIV treatment, inappropriate ventilation pressures, low experience of the clinical team, and, most importantly, the patient's clinical condition (i.e. two or more organ failures). Strong experimental evidence supports<sup>1–8</sup> the NIV use to avoid intubation in patients with ARF from COPD exacerbations,<sup>10 11 13–15 72</sup> acute cardiogenic pulmonary oedema,<sup>19–30</sup> or immunosuppression.<sup>36 46 73</sup> NIV also facilitates extubation in COPD patients who had required initial intubation.<sup>9 59 61 63 69</sup> Although supporting evidence is less abundant,<sup>1–8</sup> NIV can also be considered in patients with asthma exacerbations,<sup>40 74 75</sup> pneumonia,<sup>76–78</sup> acute lung injury or acute respiratory distress syndrome,<sup>33–54 79–81</sup> post-operative respiratory failure,<sup>55–57 82</sup> and acute hypercapnic respiratory failure complicating obesity hypoventilation.<sup>83</sup> In patients with hypoxaemic ARF, NIV trial is justified if patients are carefully selected according to available guidelines and known risk factors and predictors for NIV failure by highly experienced teams.<sup>5 7 8 57 61 77–83</sup>

**Table 1** RCTs of NIV. \*NIV vs comparator (NIV/comparator); †failure: percentage of failure of ventilatory approach for major causes (hypoxia, haemodynamic instability or unstable cardiac arrhythmia, cardiac or respiratory arrest, upper airway obstruction, inability to cooperate/protect the airway, inability to clear respiratory secretions). ICU, intensive care unit; ED, emergency department; HDU, high dependency unit; RICU, respiratory intermediate care unit; POICU, postoperative intermediate care unit; OP, operating theatre; TI, tracheal intubation; SC, standard medical care (oxygen therapy); H, helmet; FM, face mask; NL, nose lesions; FL, facial lesions, EL, eye lesions; GI, gastric insufflation; I, intolerance to device; C, claustrophobia; DVT, deep venous thrombosis; AL, air leaks; OD, oral dryness; NC, nasal congestion; PNx, pneumothorax; NR, non-reported; VAP, ventilator-acquired pneumonia; CFM, cephalic face mask; IMV, invasive mechanical ventilation; PSV, pressure support ventilation; PEEP, positive end-expiratory pressure; ACV, assist-control (volume-cycled) ventilation; SIMV, synchronized intermittent mandatory ventilation; IPAP, inspiratory positive airway pressure; EPAP, expiratory positive pressure; CPAP, continuous positive airway pressure

| Study                                     | Site    | Interface*        | Ventilation mode*     | Patients (n)* | Failure (%)*† | Minor complications (%) |
|-------------------------------------------|---------|-------------------|-----------------------|---------------|---------------|-------------------------|
| <b>COPD</b>                               |         |                   |                       |               |               |                         |
| Bott and colleagues <sup>10</sup>         | Ward    | Nasal mask        | CPAP/SC               | 30/30         | 10/30         | NR                      |
| Brochard and colleagues <sup>11</sup>     | ICU     | Facial mask       | PSV/SC                | 43/42         | 26/74         | NL: 2                   |
| Barbé and colleagues <sup>12</sup>        | Ward    | Nasal mask        | IPAP+EPAP/SC          | 14/10         | 29/NR         | NR                      |
| Plant and colleagues <sup>13</sup>        | ED      | Facial-nasal mask | PSV+PEEP/SC           | 118/118       | 15/23         | NR                      |
| Conti and colleagues <sup>14</sup>        | ICU     | Facial mask/TI    | PSV/ACV+PEEP          | 23/26         | 52/NR         | NR                      |
| Keenan and colleagues <sup>15</sup>       | ICU     | Facial mask       | IPAP+EPAP/SC          | 25/27         | 8/7           | I: 12                   |
| Kirakli and colleagues <sup>16</sup>      | ICU     | Facial mask       | PSV/APCV+PEEP         | 17/17         | 24/18         | I: 9                    |
| Carrera and colleagues <sup>17</sup>      | ED      | Facial mask       | IPAP+EPAP/SC          | 37/38         | 14/34         | NR                      |
| Maggiore and colleagues <sup>18</sup>     | ICU     | Facial mask       | PSV+PEEP/PSV+PEEP     | 102/102       | 25/30         | NL: 7; GI: 3; EL: 6     |
| <b>ACPO</b>                               |         |                   |                       |               |               |                         |
| Bersten and colleagues <sup>19</sup>      | ED-ICU  | facial mask       | CPAP/SC               | 19/20         | 0/35          | NR                      |
| Mehta and colleagues <sup>20</sup>        | ED-ICU  | Nasal mask        | IPAP+EPAP/CPAP        | 14/13         | 7/8           | I: 8                    |
| Masip and colleagues <sup>21</sup>        | ICU     | Facial mask       | PSV+PEEP/SC           | 19/18         | 5/33          | GI: 5; I: 16            |
| Levitt <sup>22</sup>                      | ED      | Facial mask       | IPAP+EPAP/SC          | 21/17         | 24/41         | I: 19                   |
| Nava and colleagues <sup>23</sup>         | ED      | Facial mask       | PSV+PEEP/SC           | 65/65         | 20/25         | NL: 22; I: 6            |
| Bellone and colleagues <sup>24</sup>      | ED      | Facial mask       | PSV+PEEP/CPAP         | 24/22         | 8/5           | NR                      |
| Crane and colleagues <sup>25</sup>        | ED      | Facial mask       | IPAP+EPAP /SC         | 20/20         | 5/5           | I: 10; NL: 5; GI: 8     |
| Bellone and colleagues <sup>26</sup>      | ED      | Facial mask       | PSV+PEEP/CPAP         | 18/18         | 11/6          | NR                      |
| Moritz and colleagues <sup>27</sup>       | ED      | Facial mask       | IPAP+EPAP/CPAP        | 60/69         | 4/2           | NR                      |
| Ferrari and colleagues <sup>28</sup>      | HDU     | Facial mask       | PSV+PEEP/CPAP         | 27/25         | 4/0           | NR                      |
| Gray and colleagues <sup>29</sup>         | ED      | Facial mask       | CPAP/SC               | 346/367       | 2/3           | NR                      |
| Rusterholtz and colleagues <sup>30</sup>  | ICU     | Facial mask       | PAV+PEEP/CPAP         | 17/19         | 41/31         | NR                      |
| Ferrari and colleagues <sup>31</sup>      | ED      | Facial mask       | PSV+PEEP/CPAP         | 40/40         | 8/0           | NR                      |
| Nouira and colleagues <sup>32</sup>       | ED      | Facial mask       | PSV+PEEP/CPAP         | 99/101        | 7/10          | NR                      |
| <b>Hypoxic ARF</b>                        |         |                   |                       |               |               |                         |
| Wysocki and colleagues <sup>33</sup>      | ICU     | Facial mask       | PSV+PEEP/SC           | 21/20         | 62/70         | NR                      |
| Antonelli and colleagues <sup>34</sup>    | ICU     | Facial mask/TI    | PSV+PEEP/SC           | 32/32         | 31/47         | NL: 5                   |
| Delclaux and colleagues <sup>35</sup>     | ICU     | Facial mask       | CPAP/SC               | 62/61         | 34/39         | I: 14; NL: 3; GI: 2     |
| Hilbert and colleagues <sup>36</sup>      | ICU     | Facial mask       | PSV+PEEP/SC           | 26/26         | 46/77         | NL: 23                  |
| Ferrer and colleagues <sup>37</sup>       | ICU     | Facial mask       | PSV+PEEP/SC           | 51/54         | 25/52         | NL: 25; GI: 2; EL: 6    |
| Cosentini and colleagues <sup>38</sup>    | HDU     | Helmet            | CPAP/SC               | 20/27         | 0/0           | I: 5                    |
| Fartoukh and colleagues <sup>39</sup>     | ED-ward | Facial mask       | PSV+PEEP-IPAP+EPAP/SC | 35/36         | 6/NR          | NR                      |
| Gupta and colleagues <sup>40</sup>        | ICU     | Facial mask       | PSV+PEEP/SC           | 28/25         | 7/16          | NR                      |
| Wermke and colleagues <sup>41</sup>       | Ward    | Facial mask       | PSV+PEEP/SC           | 43/44         | 14/25         | NR                      |
| <b>Hypoxic-hypercapnic ARF</b>            |         |                   |                       |               |               |                         |
| Kramer and colleagues <sup>42</sup>       | ICU     | Nasal mask        | IPAP+EPAP/SC          | 16/15         | 31/73         | NL: 13; AL: 13; I: 13   |
| Wood and colleagues <sup>43</sup>         | ED      | Nasal mask        | IPAP+EPAP/SC          | 11/16         | 31/68         | PNx: 6                  |
| Celikel and colleagues <sup>44</sup>      | ICU     | Facial mask       | PSV+PEEP/SC           | 15/15         | 7/40          | NL: 46; GI: 6           |
| Confalonieri and colleagues <sup>45</sup> | ICU     | Nasal mask        | PSV+PEEP/SC           | 28/28         | 21/61         | GI: 4                   |
| Antonelli and colleagues <sup>46</sup>    | ICU     | Facial mask       | PSV+PEEP/SC           | 20/20         | 20/70         | NL: 5                   |

Continued

Downloaded from https://academic.oup.com/bja/article/110/6/896/246098 by guest on 19 April 2024

Table 1 Continued

| Study                                        | Site  | Interface*        | Ventilation mode*    | Patients (n)* | Failure (%)*† | Minor complications (%)          |
|----------------------------------------------|-------|-------------------|----------------------|---------------|---------------|----------------------------------|
| Martin and colleagues <sup>47</sup>          | ICU   | Facial mask       | IPAP+EPAP/SC         | 32/29         | 28/59         | NR                               |
| Gay and colleagues <sup>48</sup>             | ICU   | Facial mask       | PSV+PEEP/PAV+PEEP    | 23/21         | 4/10          | NL: 26; C: 11                    |
| Kwok and colleagues <sup>49</sup>            | ICU   | Nasal/facial mask | IPAP+EPAP/ IPAP+EPAP | 35/35         | 23/23         | I: 34(NM) - 11 (FM)              |
| Fernández-Vivas and colleagues <sup>50</sup> | ICU   | Facial mask       | PSV+PEEP/ACV+PEEP    | 59/58         | 37/34         | NL: 26; GI: 6 EL: 9; I: 13       |
| Honrubia and colleagues <sup>51</sup>        | ICU   | Facial mask       | PSV+PEEP/ ACV+PEEP   | 31/33         | 58/100        | NL: 13                           |
| Cuvelier and colleagues <sup>52</sup>        | RICU  | Full-facial mask  | IPAP+EPAP/ IPAP+EPAP | 17/17         | 6/0           | CFM: 6; GI: 6; EL: 6             |
| Girault and colleagues <sup>53</sup>         | ICU   | Facial/nasal mask | PSV+PEEP/PSV+PEEP    | 46/44         | 20/14         | AL: 68 (NM)                      |
| Nava and colleagues <sup>54</sup>            | RICU  | Facial mask       | PSV+PEEP/SC          | 42/44         | 24/27         | NR                               |
| Postoperative ARF                            |       |                   |                      |               |               |                                  |
| Auriant and colleagues <sup>55</sup>         | ICU   | Nasal mask        | IPAP+EPAP/SC         | 24/24         | 21/50         | I: 13                            |
| Böhner and colleagues <sup>56</sup>          | POICU | Nasal mask        | CPAP/SC              | 99/105        | 1/5           | NL: 4; I: 9                      |
| Squadrone and colleagues <sup>57</sup>       | ICU   | Helmet            | CPAP/SC              | 105/104       | 1/10          | NR                               |
| Post-extubation                              |       |                   |                      |               |               |                                  |
| Jiang and colleagues <sup>58</sup>           | ICU   | Facial mask       | IPAP+EPAP/SC         | 47/46         | 28/15         | NR                               |
| Keenan and colleagues <sup>59</sup>          | ICU   | Facial mask       | IPAP+EPAP/SC         | 39/42         | 72/69         | NR                               |
| Esteban and colleagues <sup>60</sup>         | ICU   | Facial mask       | PSV+PEEP/SC          | 114/104       | 48/48         | I: 3                             |
| Nava and colleagues <sup>61</sup>            | ICU   | Facial mask       | IPAP+EPAP/SC         | 48/49         | 8/24          | I: 8; NL: 29; EL: 4; NC: 4;OD: 2 |
| Kindgen-Milles and colleagues <sup>62</sup>  | ICU   | Nasal mask        | CPAP/SC              | 25/25         | 4/16          | NR                               |
| Ferrer and colleagues <sup>63</sup>          | ICU   | Facial mask       | IPAP+EPAP/SC         | 79/83         | 11/22         | NL: 6; GI: 1                     |
| Ferrer and colleagues <sup>64</sup>          | ICU   | Facial mask       | IPAP+EPAP/SC         | 54/54         | 11/19         | NR                               |
| Zarbock and colleagues <sup>65</sup>         | POICU | Nasal mask        | CPAP/SC              | 232/236       | 1/3           | NR                               |
| Khilnani and colleagues <sup>66</sup>        | ICU   | Facial mask       | PSV+PEEP/SC          | 20/20         | 15/25         | ?                                |
| Weaning                                      |       |                   |                      |               |               |                                  |
| Nava and colleagues <sup>67</sup>            | ICU   | Facial mask/TI    | PSV+PEEP/PSV+PEEP    | 25/25         | 12/32         | NL: 56; GI: 2                    |
| Girault and colleagues <sup>68</sup>         | ICU   | Facial mask       | PSV+PEEP/PSV+PEEP    | 16/17         | 24/25         | NR                               |
| Ferrer and colleagues <sup>69</sup>          | ICU   | Facial mask       | PSV+PEEP/PSV+PEEP    | 21/22         | 14/27         | NL: 29; GI: 5                    |
| Trevisan and colleagues <sup>70</sup>        | ICU   | Facial mask       | PSV+PEEP/ PSV+PEEP   | 21/22         | 21/NR         | NL: 4                            |
| Girault and colleagues <sup>71</sup>         | ICU   | Facial mask       | PSV+PEEP/SC          | 68/70         | 32/29         | GI: 7; I: 7                      |

The degree of lung involvement represents a key factor in NIV success or failure and it cannot be estimated easily.<sup>76 79</sup> In hypoxaemic ARF, NIV failure is predicted by advanced age, high acuity illness on admission (i.e. Simplified Acute Physiology Score II, SAPS-II, of >34), acute respiratory distress syndrome, community-acquired pneumonia with or without sepsis, and multi-organ system failure.<sup>8 10 11 28 35 76–79 81</sup> In hypercapnic ARF patients, failure is predicted by unimproved or worsened pH or respiratory rate, high-acuity illness at admission (i.e. SAPS-II >34), and lack of cooperation.<sup>8 76 79</sup> Some laboratory indices are more sensitive than clinical findings. Specifically, an unimproved or worsened  $Pa_{O_2}/F_{I_{O_2}}$  ratio during a 1 h NIV accurately predicts NIV failure.<sup>76 79</sup> Compared with the  $Pa_{O_2}/F_{I_{O_2}}$  ratio, however, the oxygenation index provides a superior estimate of lung function involvement and is a better predictor of NIV failure.<sup>76</sup>

Patient selection and monitoring are crucial to reduce NIV failure. NIV should not be used in patients suffering from

claustrophobia, in respiratory arrest, or who are unable to tolerate the NIV device because of agitation or uncooperativeness.<sup>1 3 5 6 8</sup> NIV is contraindicated in patients who are unable to protect their airway due to a swallowing impairment or excessive secretions not sufficiently managed by clearance techniques, and after recent upper airway surgery.<sup>1 3 5 6 8</sup> Such patients need prompt IMV that, when postponed, is associated with increased morbidity and mortality.<sup>1 3 5 6 8</sup> All patients started on NIV should be monitored closely for signs of NIV failure until stabilized.<sup>4–8</sup>

## Major NIV complications

### Pneumonia

Depending on the comparator control population, NIV may modify the risk of nosocomial-acquired pneumonia. In single studies and in meta-analysis reviews, NIV reduces by three to five times the risk of pneumonia associated with



**Table 2** Failure incidence and major complications of NIV. COPD, chronic obstructive pulmonary disease; ACPO, acute cardiogenic pulmonary oedema; ARF, acute respiratory failure; PS, pressure support; PIP, peak inspiratory pressure; PEEP, positive end-expiratory pressure

| Complication                   | Incidence (%) | Remedies                                                                                                                                                                                                                                                                                                                                                                                                                                                                                                                                                                                                           |
|--------------------------------|---------------|--------------------------------------------------------------------------------------------------------------------------------------------------------------------------------------------------------------------------------------------------------------------------------------------------------------------------------------------------------------------------------------------------------------------------------------------------------------------------------------------------------------------------------------------------------------------------------------------------------------------|
| Failure (hypoxaemia)           |               |                                                                                                                                                                                                                                                                                                                                                                                                                                                                                                                                                                                                                    |
| - COPD exacerbations           | 8–30          | <ul style="list-style-type: none"> <li>- Careful patient selection according to available guidelines, clinical judgement, and known risk factors and predictors for NIV failure</li> <li>- Choose the correct interface and size</li> <li>- Give high-flow oxygen</li> <li>- Optimize ventilatory support (i.e. increase pressure support gradually to get expiratory tidal volume 6 ml kg<sup>-1</sup> or higher, titrate F<sub>I</sub>O<sub>2</sub> and PEEP level, aiming for S<sub>a</sub>O<sub>2</sub> &gt;90% and consider the risk of air leaks, patient-ventilator dyssynchrony and discomfort)</li> </ul> |
| - ACPO                         | 5–31          |                                                                                                                                                                                                                                                                                                                                                                                                                                                                                                                                                                                                                    |
| - Hypoxaemic ARF               | 7–52          |                                                                                                                                                                                                                                                                                                                                                                                                                                                                                                                                                                                                                    |
| - Hypercapnic – hypoxaemic ARF | 15–62         |                                                                                                                                                                                                                                                                                                                                                                                                                                                                                                                                                                                                                    |
| - Post-extubation ARF          | 1–72          |                                                                                                                                                                                                                                                                                                                                                                                                                                                                                                                                                                                                                    |
| - Weaning                      | 16–25         |                                                                                                                                                                                                                                                                                                                                                                                                                                                                                                                                                                                                                    |
| Aspiration pneumonia           | <5            | <ul style="list-style-type: none"> <li>- Careful patient selection</li> <li>- Place the patient in the sitting position</li> <li>- Optimize ventilatory support (i.e. avoid PS &gt; 20 cm H<sub>2</sub>O)</li> <li>- Wait at least half an hour after a meal</li> <li>- Gastric drainage when appropriate</li> </ul>                                                                                                                                                                                                                                                                                               |
| Barotrauma                     | Rare          | <ul style="list-style-type: none"> <li>- Careful patient selection</li> <li>- Choose correct interface and size</li> <li>- Optimize ventilatory support (i.e. avoid PIP &gt; 25 cm H<sub>2</sub>O)</li> </ul>                                                                                                                                                                                                                                                                                                                                                                                                      |
| Hypotension                    | Infrequent    | <ul style="list-style-type: none"> <li>- Careful patient selection (i.e. avoid medically unstable patient, hypotensive shock, uncontrolled cardiac ischaemia or arrhythmia, uncontrolled bleeding)</li> <li>- Consider adequate hydration and therapy, especially in septic patients</li> <li>- Optimize ventilatory support (i.e. avoid or reduce PEEP level)</li> </ul>                                                                                                                                                                                                                                          |

IMV, especially in immunosuppressed patients and those with comorbidities (reported RR 0.31, 95% CI: 0.16–0.57,  $P=0.0002$ ).<sup>8 11 18 34 46 57 67 69 84–87</sup> The benefit is strong not only for patients with hypercapnic ARF from COPD or acute cardiogenic pulmonary oedema, but also for those with postoperative hypoxaemia (2% vs 10% of patients, reported RR 0.19, 95% CI 0.04–0.88,  $P=0.02$ ).<sup>57 84 85</sup>

In uncontrolled studies, NIV proved superior to standard medical therapy in preventing pneumonia (reported RR 0.56, 95% CI: 0.31–1.02,  $P=0.06$ ).<sup>85 86</sup> In a recent survey of 6869 pneumonia cases from 400 German ICUs, the mean pneumonia incidences were 1.58 and 5.44 cases per 1000 ventilator days for NIV and IMV, respectively, and 0.58 cases associated with no ventilation, which suggests that NIV increases pneumonia risk.<sup>86</sup> However, there were no differences in the proportion of secondary sepsis and death between NIV and standard therapy.<sup>85 86</sup> In contrast, previous investigations reported a lower incidence of pneumonia with NIV than with no ventilation. All these studies are hampered by several shortcomings. First, NIV-associated pneumonia is uncommon and potentially under-reported.<sup>86</sup> Secondly, studies designed to determine whether NIV *per se* alters nosocomial pneumonia risk are few and retrospective. Thirdly, NIV reduces intubation rate and mortality, but it is not known whether patients who needed intubation or died had pneumonia.

Although the issue of nosocomial pneumonia from NIV remains unsettled, NIV requires caution regarding aspiration risk. Pneumonia is a possible event during NIV and results secondary to inhalation of foreign materials (i.e. condensed fluid in the ventilator circuit) or aspiration of gastric contents and secretions.<sup>85–87</sup> Although unreported in RCTs,<sup>9–71</sup> aspiration pneumonia has been described in as many as 5% of NIV patients.<sup>3 85–87</sup> The risk of aspiration pneumonia is minimized by excluding patients with compromised upper airway function or with difficulty in clearing secretions, by permitting at-risk patients nothing by the mouth until they are stabilized, and by placing the patient in the sitting or semi-sitting position during NIV.<sup>85–87</sup> Caution should be taken in patients with excessive gastric distension, ileus, nausea or vomiting, or in those who are deemed to be at high risk for gastric aspiration (i.e. gastrooesophageal reflux disease).<sup>87</sup> A nasogastric tube can be inserted, but it can interfere with mask fitting, promote air leaking, and add to discomfort.<sup>5</sup> Finally, physicians should be wary of sedating patients during NIV.<sup>87</sup>

### Barotrauma

Barotrauma is a well-recognized complication of positive pressure ventilation.<sup>88</sup> The risk of barotrauma is very low during NIV and much lower than during IMV.<sup>3 87</sup> Barotrauma has been described in the presence of COPD, acute lung

injury secondary to pneumonia, interstitial lung diseases, cystic fibrosis, and neuromuscular disorders.<sup>40 88 89</sup>

Barotrauma risk can be minimized by adopting the following approaches: using pressure-controlled ventilation, especially in patients with low pulmonary compliance; keeping the peak inspiratory pressure as low as possible (i.e. <30 cm H<sub>2</sub>O); optimizing the inspiratory and expiratory times in order to allow sufficient expiratory time to avoid auto-PEEP and breath stacking; applying a PEEP not exceeding auto-PEEP; and avoiding patient-ventilator desynchronization (Table 4).<sup>88 89</sup> When attempting to balance adequate ventilation with peak inspiratory pressure, some patients may develop mild hypercapnia, which is acceptable as long as the patient remains asymptomatic.<sup>89</sup>

### Haemodynamic effects

Artificial ventilation can have negative haemodynamic effects because by increasing intrathoracic pressure, it reduces venous return (preload) and left and right ventricle filling.<sup>90-93</sup> Continuous positive airway pressure (CPAP) decreases cardiac output (CO) and stroke volume (SV) in a pressure-dependent fashion, and increases systemic vascular resistance without changing heart rate and arterial pressure (AP) both in healthy subjects and in patients at risk for respiratory distress, and during NIV via a mask or helmet.<sup>90-96</sup> In stable COPD patients, pressure-support ventilation (PSV) (PS of 10–20 cm H<sub>2</sub>O over PEEP of 5 cm H<sub>2</sub>O) decreases CO without changing arterial AP or heart rate.<sup>97</sup> In COPD patients with severe hypercapnic ARF, PSV (i.e. PS of 12 cm H<sub>2</sub>O over PEEP 3 cm H<sub>2</sub>O) through a full face mask decreases CO by 10–13%.<sup>98</sup> NIV has more evident haemodynamic effects in patients with severe disease who are hypotensive or have a low circulating blood volume (i.e. fluid depletion), and in patients with an underlying cardiac disease without adequate pharmacological therapy.<sup>3 99</sup> PSV (i.e. PS of 5 cm H<sub>2</sub>O over PEEP 4 cm H<sub>2</sub>O) reduces cardiac index by >15% in COPD patients with severe ARF and fluid depletion.<sup>99</sup> In the presence of acute lung injury, NIV has negligible effects on haemodynamics.<sup>94</sup>

In patients with ARF after lung or liver transplant, neither CPAP (i.e. 5 cm H<sub>2</sub>O) nor PSV (i.e. PS of 15 cm H<sub>2</sub>O over PEEP 5 cm H<sub>2</sub>O) altered the CO, heart rate, or mean AP.<sup>100</sup> In patients requiring post-extubation NIV, neither a face mask nor a helmet altered haemodynamics.<sup>100 101</sup> In the presence of acute impairment of left ventricle performance, NIV may have beneficial effects.<sup>102-104</sup> CPAP lowers left ventricular transmural pressure and afterload and increases CO, providing additional rationale for NIV use in treating such patients.<sup>6</sup>

<sup>8 104</sup> In patients with acute decompensation of congestive heart failure, nasal CPAP (5–15 cm H<sub>2</sub>O) increases CO and SV by ~15% and the effects persist after CPAP discontinuation.<sup>102</sup> This has been interpreted as improved cardiac performance by CPAP.<sup>102 103</sup> For the same reason, in patients with acute cardiogenic pulmonary oedema, CPAP and PSV (i.e. PS of 5 or 10 cm H<sub>2</sub>O over PEEP of 5 cm H<sub>2</sub>O) may be or not associated with altered heart rate, AP, CO, and

SV.<sup>102 103 105 106</sup> High CPAP caused small decreases of CO (i.e. <10%) of doubtful clinical significance.<sup>103</sup> In patients with chronic heart disease and pulmonary capillary wedge pressures <12 mm Hg, CO and SV decreased by 24% and 22%, respectively, during nasal CPAP at 10 cm H<sub>2</sub>O, and by 26% and 24% during nasal bi-level positive airway pressures of 10/15 cm H<sub>2</sub>O.<sup>106</sup> In patients with pulmonary capillary wedge pressures >12 mm Hg, there were no changes in haemodynamic parameters.<sup>106</sup> In general, NIV seems to have significant effects on haemodynamics of patients with ARF. Special precautions should be taken in patients with fluid depletion and in those with poor left ventricular function or cardiac disease without adequate pharmacological therapy.<sup>3</sup> In patients with chronic right ventricular dysfunction and/or reduced LV compliance, with or without lung hyperinflation, both PEEP application and the cautious delivery of conservative tidal volumes can prevent negative circulatory effects (Table 4).<sup>104</sup>

### Minor NIV complications

#### Interface-related complications

**Arm oedema and deep venous thrombosis** Oedema is the result of uncompensated fluid filtration from blood vessels to the tissue in the upper extremity that may be aggravated by lymphatic drainage failure as during helmet NIV (Table 3).<sup>72 107</sup> The helmet is secured by two armpit braces to a pair of hooks on the plastic ring that joins the helmet to a soft collar.<sup>72</sup> Prolonged compression from the armpit braces may produce venous and lymphatic stasis with consequent oedema.<sup>72</sup> Such occurrence is more frequent in patients with severe malnutrition and cachexia and may promote deep venous thrombosis in the axillary vein that requires anticoagulant therapy.<sup>72</sup> Proper brace fixation is essential.<sup>72</sup> These side-effects might be prevented by substituting armpit braces with elastic bands that can be fixed to the bed.

**Carbon dioxide rebreathing** Carbon dioxide (CO<sub>2</sub>) rebreathing may impair CO<sub>2</sub> elimination and load the ventilatory muscles.<sup>108-114</sup> Rebreathing may be related to the interface used for NIV, ventilator circuit, and the mode and respiratory pattern of NIV delivery.<sup>109</sup>

The interface for NIV and ventilator circuit represent an additional dead space which increases the chances of CO<sub>2</sub> rebreathing in proportion to dead space volume.<sup>108 114</sup> The dead space of facial and nasal masks is small compared with the tidal volume, and the amount of CO<sub>2</sub> that is rebreathed is also small.<sup>110</sup> Unlike masks, helmets predispose to CO<sub>2</sub> rebreathing because its internal gas volume is larger than the tidal volume.<sup>72 110 111</sup> Nevertheless, this beneficial effect decreases quasi-linearly as tidal volume decreases.<sup>112</sup> Decreasing helmet size will not necessarily prevent CO<sub>2</sub> rebreathing.<sup>110</sup> When CPAP is delivered through a helmet with a valveless continuous flow system, CO<sub>2</sub> rebreathing is minimized by a high fresh gas flow.<sup>110 113</sup> CO<sub>2</sub> rebreathing has been documented with some common home ventilators that have a single gas delivery circuit and

**Table 3** Problems related to interface-ventilator interaction during NIV and remedies. \*With helmet NIV only. †The incidence of skin abrasion or necrosis may increase to 100% after 48 h of NIV with the mask. CO<sub>2</sub>, carbon dioxide; CPAP, continuous positive airway pressure; PS, pressure support; PIP, peak inspiratory pressure; PEEP, positive end-expiratory pressure; NAVA, neurally adjusted ventilatory assist

| Problem                     | Incidence (%) | Remedies                                                                                                                                                                                                                                                                                                                                                                                                                                                                                                                                                                                                                                                                  |
|-----------------------------|---------------|---------------------------------------------------------------------------------------------------------------------------------------------------------------------------------------------------------------------------------------------------------------------------------------------------------------------------------------------------------------------------------------------------------------------------------------------------------------------------------------------------------------------------------------------------------------------------------------------------------------------------------------------------------------------------|
| Arm oedema*                 | <5            | <ul style="list-style-type: none"> <li>- Careful patient selection</li> <li>- Check helmet armpits, use elastic bands</li> <li>- Optimize ventilatory support (i.e. reduce pressures slightly)</li> <li>- Change interface</li> </ul>                                                                                                                                                                                                                                                                                                                                                                                                                                     |
| CO <sub>2</sub> rebreathing | 50-100        | <ul style="list-style-type: none"> <li>- Careful patient selection</li> <li>- Choose correct interface and size</li> <li>- Optimize ventilatory support (i.e. reduce RR, ensure an adequate inspiratory tidal volume, increase the expiratory time, add PEEP ≥ 4 cm H<sub>2</sub>O)</li> <li>- Reduce high end-tidal CO<sub>2</sub> (i.e. reduction in caloric intake)</li> <li>- Use a two-line ventilatory circuit</li> <li>- Use interface with exhalation ports located within the mask</li> <li>- Insert foam rubber to reduce dead space</li> </ul>                                                                                                                 |
| Claustrophobia              | 5-20          | <ul style="list-style-type: none"> <li>- Select carefully the patient</li> <li>- Choose correct interface and size</li> <li>- Use of manual mask application (i.e. placing the interface gently over face, holding it in place and starting ventilation; then tighten straps to avoid major air leaks)</li> <li>- Start a prudent ventilatory support (i.e. starting with CPAP and adding the lowest PS needed to improve patient comfort)</li> <li>- Optimize ventilatory support (i.e. reduce pressures slightly)</li> <li>- Reassure patient</li> <li>- Change device (i.e. consider the helmet instead of the face mask)</li> <li>- Consider mild sedation</li> </ul> |
| Discomfort                  | 30-50         | <ul style="list-style-type: none"> <li>- Careful patient selection</li> <li>- Choose correct interface and size</li> <li>- Check mask fit, readjust straps (masks) or helmet armpits (helmet)</li> <li>- Change strap system or device</li> <li>- Optimize ventilatory support (i.e. reduce pressures slightly, decrease leaks)</li> <li>- Reassure patient</li> <li>- Consider mild sedation</li> </ul>                                                                                                                                                                                                                                                                  |
| Mechanical                  | Infrequent    | <ul style="list-style-type: none"> <li>- Check equipment</li> <li>- Active alarm system</li> </ul>                                                                                                                                                                                                                                                                                                                                                                                                                                                                                                                                                                        |
| Nasal skin lesions†         | 2-50          | <ul style="list-style-type: none"> <li>- Choose correct interface and size</li> <li>- Use interfaces with a smaller mask area and a larger mask cushion</li> <li>- Consider water instead of air to fill the cushion of a facemask</li> <li>- Check mask fit, readjust straps (masks)</li> <li>- Consider forehead spacer, artificial skin, Granuflex® dressing</li> <li>- Change device (i.e. consider full face mask or helmet)</li> <li>- Optimize ventilatory support (i.e. reduce pressures slightly)</li> </ul>                                                                                                                                                     |
| Noise                       | 50-100        | <ul style="list-style-type: none"> <li>- Choose correct interface and size</li> <li>- Change device (i.e. consider the face mask instead of the helmet)</li> <li>- Use heat and moisture, earplugs, sound traps</li> </ul>                                                                                                                                                                                                                                                                                                                                                                                                                                                |

Continued

Downloaded from https://academic.oup.com/bja/article/110/6/896/246098 by guest on 19 April 2024



Table 3 Continued

| Problem                         | Incidence (%) | Remedies                                                                                                                                                                                                                                                                                                                                                                                                                                                                                              |
|---------------------------------|---------------|-------------------------------------------------------------------------------------------------------------------------------------------------------------------------------------------------------------------------------------------------------------------------------------------------------------------------------------------------------------------------------------------------------------------------------------------------------------------------------------------------------|
| Patient-ventilator dyssynchrony | 13-100        | <ul style="list-style-type: none"> <li>- Careful patient selection</li> <li>- Choose correct interface and size</li> <li>- Optimize ventilatory support (i.e. increase PS, add PEEP, increase inspiratory flow trigger, and use low respiratory rate for the helmet)</li> <li>- Check factors for patient-ventilator dyssynchrony (i.e. air leaks, water in circuit, noise)</li> <li>- Consider a reduction in PS to a tidal volume of about 6 ml kg<sup>-1</sup></li> <li>- Consider NAVA</li> </ul> |

do not contain a true exhalation valve. Using a two-line circuit with a non-rebreather valve, or masks with exhalation ports located within the mask instead of in the ventilator circuit, are expected to minimize the CO<sub>2</sub> rebreathing during NIV.<sup>109</sup> Other factors that may enhance CO<sub>2</sub> rebreathing are the end-tidal CO<sub>2</sub> concentration, respiratory rate, and PEEP level.<sup>109 110</sup> Among these, high end-tidal CO<sub>2</sub> concentration correlates with an increased possibility that the CO<sub>2</sub> fraction for inspiratory tidal volume will exceed 0.10% and this is likely to occur in patients with increased CO<sub>2</sub> production (i.e. infections and high caloric intake), and/or during helmet NIV.<sup>109 111</sup> Lowering the respiratory rate, ensuring an adequate inspiratory tidal volume, adding PEEP, and increasing the expiratory time have been advocated as general measures to reduce CO<sub>2</sub> rebreathing (Table 4).<sup>110</sup>

**Claustrophobia** Claustrophobia may present as minor discomfort or, worse, as a frightening sense of restriction and suffocation. Claustrophobia involves not only the impossibility to begin, but also to continue NIV with a variable incidence that ranges from 5% to 20%.<sup>1-3 16 20 37 48 50 72 80 87</sup> Nasal masks are less likely to cause claustrophobia than face masks.<sup>5 8 27 115 116</sup> Although some authors consider claustrophobia as a long-term adverse experience during helmet NIV, helmet use is actually believed to minimize this event.<sup>8 105 116 117</sup> The proper choice and application of the device is crucial to ameliorate claustrophobia (Table 4).<sup>1-3 8 87 118 119</sup>

**Discomfort** Although NIV is generally perceived as more comfortable for patients than IMV, intolerance may affect as many as 30-50% of patients, and despite the best efforts of skilled caregivers, discomfort remains responsible for 12-33% of NIV failure.<sup>3 12 14 20 29 38 42-44 49 51 52 61 73 87 120</sup>

Discomfort is related to the device and the ventilation modality adopted for NIV.<sup>1-3 8 87</sup> Among different models of NIV masks, tolerance was poorest for the mouthpiece followed by the nasal and oronasal masks.<sup>121</sup> All attachment systems were considered variably uncomfortable against the skin, and tolerance may decrease by tightening the straps in an attempt to reduce air leaks and improve patient-ventilator synchrony.<sup>116 121</sup> It may require a change to a different strap system or mask in order to reduce the discomfort.<sup>8 87 121</sup>

Helmets are better tolerated than masks, resulting in longer use and lower NIV failure rates.<sup>72 76 80 87 116 118 121-123</sup> However, other authors found that comfort was similar with the two interfaces or even worse with the helmet.<sup>96 111 124</sup> A short NIV duration may explain lack of differences in comfort between NIV with the mask and helmet in the acute setting.<sup>96</sup>

On average, patients are more comfortable with PSV than volume-controlled ventilation; therefore, PSV should be the preferred mode for NIV in the acute setting.<sup>125</sup> During PSV, the comfort levels follow a U-shaped trend when level of assistance is modified, and the extreme levels of PS (both lowest and highest) are associated with the worst comfort.<sup>126</sup> So, as for IMV, choosing an optimal PS is important for patient degree of comfort during NIV.<sup>126 127</sup> With a helmet, it is advisable to increase both the PS level and PEEP and to use a higher pressurization rate than with a facial mask.<sup>96</sup>

In uncontrolled studies, patient discomfort diminished without worsening respiratory function with remifentanyl-based sedation and target-controlled propofol infusion during NIV.<sup>128 129</sup> However, sedation during NIV will remain controversial and an unsettled issue until larger controlled investigations is carried out.

**Facial skin lesions** Nasal skin lesions (i.e. erythema, ulcers) at the site of mask contact increase with longer NIV durations.<sup>3 8</sup> Nasal lesions account for a large portion of mask NIV complications, occurring in 5-30%<sup>18 23 25 34 36 37 42 44 46 48 50 51 61 63 69 72</sup> to 50%<sup>44 67</sup> of patients after a few hours and in, virtually, 100% of patients after 48 h of mask NIV.<sup>130</sup> The development of skin abrasions or necrosis is one factor that can limit the tolerance and duration of mask NIV.<sup>1-3 8 87 130</sup> During NIV, lesions develop more frequently on the bridge of the nose.<sup>115 130</sup> Progressive tightening of the harness, increasing the air volume in the mask cushions, and increasing inspiratory pressure are factors that promote nasal pressure lesions.<sup>130</sup> Strategies to decrease the incidence of nasal skin lesions during NIV should be carefully considered from the beginning of therapy.<sup>3 8 87 130 131</sup>

**Table 4** Problems related to air pressure and flow during NIV and remedies. NM, nasal mask; FM, facial mask

| Problem                                            | Incidence (%) | Remedies                                                                                                                                                                                                                                                                                                                                        |
|----------------------------------------------------|---------------|-------------------------------------------------------------------------------------------------------------------------------------------------------------------------------------------------------------------------------------------------------------------------------------------------------------------------------------------------|
| Aerophagia                                         | Common        | <ul style="list-style-type: none"> <li>- Reassure patient</li> <li>- Consider simethicone</li> </ul>                                                                                                                                                                                                                                            |
| Air leaks                                          |               |                                                                                                                                                                                                                                                                                                                                                 |
| (1) Minor air leaks                                | 80–100        | <ul style="list-style-type: none"> <li>- Careful patient selection</li> </ul>                                                                                                                                                                                                                                                                   |
| (2) Major air leaks                                |               | <ul style="list-style-type: none"> <li>- Choose correct interface and size</li> </ul>                                                                                                                                                                                                                                                           |
| - Mouthpiece                                       | 68            | <ul style="list-style-type: none"> <li>- Prefer ventilator with air-leak compensation</li> </ul>                                                                                                                                                                                                                                                |
| - Nasal mask                                       | 34            | <ul style="list-style-type: none"> <li>- Encourage mouth closure with NM</li> </ul>                                                                                                                                                                                                                                                             |
| - Oronasal mask                                    | 31            | <ul style="list-style-type: none"> <li>- Check interface fit</li> </ul>                                                                                                                                                                                                                                                                         |
| - Integral face mask                               | 18            | <ul style="list-style-type: none"> <li>- Consider change device</li> </ul>                                                                                                                                                                                                                                                                      |
| - Helmet                                           | 18–31         | <ul style="list-style-type: none"> <li>- Optimize ventilatory support (i.e. reduce pressures slightly)</li> </ul>                                                                                                                                                                                                                               |
| Airways dryness                                    | 10–20         | <ul style="list-style-type: none"> <li>- Choose correct interface and size</li> <li>- Add humidifiers and emollients</li> <li>- Consider adequate hydration</li> <li>- Optimize ventilatory support (i.e. reduce pressures slightly)</li> </ul>                                                                                                 |
| Facial skin erythema                               | 20–34         | <ul style="list-style-type: none"> <li>- Choose correct interface and size</li> <li>- Check mask fit, readjust straps</li> <li>- Optimize ventilatory support (i.e. reduce pressures slightly)</li> <li>- Apply artificial skin</li> <li>- Ask for dermatologic consultation</li> </ul>                                                         |
| Nasal congestion                                   | 20–50         | <ul style="list-style-type: none"> <li>- Choose correct interface and size</li> <li>- Consider topical and systemic decongestants (i.e. saline solution, emollients, steroids, and antihistaminergics)</li> <li>- Optimize ventilatory support (i.e. reduce pressures slightly)</li> <li>- If NM, consider switching to FM or helmet</li> </ul> |
| Nasal or oral dryness                              | 10–20         | <ul style="list-style-type: none"> <li>- Choose correct interface and size</li> <li>- Add humidifiers, nasal saline/emollients</li> <li>- Optimize ventilatory support (i.e. decrease leaks, reduce pressures slightly)</li> </ul>                                                                                                              |
| Nose/sinus/ear pain                                | 10–30         | <ul style="list-style-type: none"> <li>- Choose correct interface and size</li> <li>- Check mask fit, readjust straps</li> <li>- Optimize ventilatory support (i.e. reduce pressures slightly)</li> </ul>                                                                                                                                       |
| Gastric insufflation                               | 10–50         | <ul style="list-style-type: none"> <li>- Choose correct interface and size</li> <li>- Optimize ventilatory support (i.e. reduce pressures slightly)</li> <li>- Gastric drainage when appropriate</li> <li>- Consider simethicone</li> </ul>                                                                                                     |
| Orthodontic problems (prolonged use of mouthpiece) | Infrequent    | <ul style="list-style-type: none"> <li>- Remodel mouthpiece</li> <li>- Consult orthodontist</li> </ul>                                                                                                                                                                                                                                          |
| Vomiting                                           | Infrequent    | <ul style="list-style-type: none"> <li>- Optimize ventilatory support (i.e. reduce pressures slightly)</li> <li>- Consider antiemetics</li> <li>- Gastric drainage when appropriate</li> <li>- Quick-release of straps and remove device if occurs</li> </ul>                                                                                   |

Downloaded from <https://academic.oup.com/bjj/article/110/6/896/246098> by guest on 19 April 2024

**Noise** During NIV, device noise may exceed usual ICU background noise and may potentially increase patient discomfort, cause sleep disruption, and affect ear function (i.e. tinnitus, temporary auditory threshold shift, or permanent hearing loss).<sup>132 133</sup> Recent studies have reported that sleep disruption in the ICU is multifactorial, and that noise is responsible for only a limited proportion of arousals and awakenings.<sup>132 134</sup> Noise level is influenced by the interface used, being significantly greater during helmet NIV than during mask NIV.<sup>132 133</sup> The intensity of noise inside the helmet during NIV may exceed 100 dB and is mostly caused by the turbulent gas flow through the respiratory circuit. The intensity of noise during mask NIV, caused primarily by the ventilator, does not exceed 70 dB and differs from the background noise that is measured bedside in the ICU.<sup>132</sup> The systems provided with a flow generator using the Venturi effect to deliver CPAP are associated with greater measured noise levels compared with noise levels from mechanical ventilators, and helmet CPAP is noisier than mask CPAP.<sup>132 133</sup> Noise exposure during helmet NIV may be attenuated by some devices. Heat and moisture exchanger (HME) filters decrease the noise perceived by subjects.<sup>132</sup> Adding sound traps to the inspiratory branch of the respiratory circuit may potentially limit noise inside the helmet without major inconvenience.<sup>132</sup> Earplugs may be effective against sleep disruption, but may also make contact with the environment more difficult.<sup>132</sup>

**Patient-ventilator dyssynchrony** During NIV, triggering and cycling-off of ventilatory assistance should be, ideally, synchronized with the patient's inspiratory efforts.<sup>135</sup> During actual NIV, there is an inspiratory delay between the beginning of the inspiratory effort and the start of the positive inspiratory pressure boost, and an expiratory delay between the time at which inspiratory flow reached 25% of its peak inspiratory value and the end of the positive inspiratory pressure boost are expected.<sup>111 136</sup> In a multicentre study, auto- and double-triggering, ineffective breaths, and premature and late cycling were observed in 12–23% of ARF patients receiving mask NIV.<sup>137</sup> When measured with a global asynchrony index, patient-ventilator dyssynchrony (PVD) was observed in 24–43% of ARF patients.<sup>137 138</sup>

Factors related to interface, patient, and ventilatory modality influence the patient-ventilator interaction during NIV.<sup>111 136 139</sup> PVD is more evident with a mouthpiece than with a nasal or an oronasal mask.<sup>136</sup> In comparison with masks, the low elasticity and high inner volume of helmets may explain the longer inspiratory and expiratory delays and worse patient-ventilator interaction.<sup>96 111</sup> Random noise, water in the circuit, or cardiogenic oscillations may result in auto-triggering, whereas low respiratory drive, weak inspiratory muscles, or dynamic hyperinflation resulting in intrinsic PEEP may cause ineffective breaths.<sup>137 138</sup> Premature cycling may be observed with increased inspiratory times in the case of a short respiratory cycle (restrictive

respiratory disease) and delayed cycling with short inspiratory times in the case of a long respiratory cycle (obstructive respiratory disease).<sup>137 138</sup> Although air leakage is a major contributing factor for PVD during mask NIV, PS level and tidal volume may also play an important role.<sup>137 139</sup> High PS levels can delay pneumatic expiratory cycling, extending the ventilator breath into neural expiration. Low PS levels may activate the expiratory cycling early, so that inspiratory muscle contraction continues into the mechanical expiratory phase, thus leading to delayed ventilator triggering and wasted trigger efforts (non-triggered breaths).<sup>135 137</sup>

During NIV, careful patient and display monitoring help to identify PVD and optimize ventilator settings, thereby reducing patient discomfort and morbidity.<sup>111 135 136 138 139</sup> Optimizing ventilatory support (i.e. increasing PS, adding PEEP, increasing inspiratory flow trigger, and using low respiratory rates for the helmet) and checking factors for PVD (i.e. air leaks, water in circuit, noise) may limit the PVD. Neurally adjusted ventilatory assist reduces PVD by reducing the triggering and cycling delays, especially at higher levels of assistance and, at the same time, preserves spontaneous breathing and blood gases.<sup>135</sup>

### Air pressure and flow-related complications

**Air leaks** Air leakage is virtually universal during NIV (Table 4). Air leaks depend on sealing features of interfaces being larger with small facial mask than with larger masks and helmets.<sup>3 72 96 114 116 121</sup> Large air leaks decrease the  $F_{I_{O_2}}$  and arterial oxygen saturation, and increase ventilator autotriggering, PVD, and rebreathing of exhaled gas, all of which increase chances of NIV failure. Hence, air leaks should be monitored closely and taken care of promptly.<sup>96 140 141</sup>

Air leaks are negligible when a proper device for NIV is chosen and fitted.<sup>96 140 141</sup> A tighter fitting of the interface may alone improve leaks and ventilation but should be done cautiously because it increases the risk of skin discomfort and damage.<sup>3 72 96 114</sup> Pressure-controlled ventilation causes less air leaks than volume-controlled ventilation because it delivers a similar tidal volume at a lower peak inspiratory pressure, but could also cause mouth and throat dryness, conjunctivitis, or sleep disturbances.<sup>141</sup> A reduction in inspiratory pressure or tidal volume may also reduce air leaks.<sup>3 8</sup>

**Nasal or oral dryness and nasal congestion** During NIV, nasal/oral dryness affects 10–20% of patients and nasal congestion 20–50% of patients, particularly when a nasal mask or nasal CPAP is used.<sup>1–3 8 87 142</sup> Nasal or oral dryness is usually indicative of air leaking through the mouth with consequent loss of the nasal mucosa's capacity to heat and to humidify inspired air. Nasal mucosa progressively dries and releases inflammation mediators that increase nasal congestion and resistance, thus reducing tidal volume and patient comfort.<sup>142 143</sup> Strategies to decrease the airways dryness and congestion during NIV

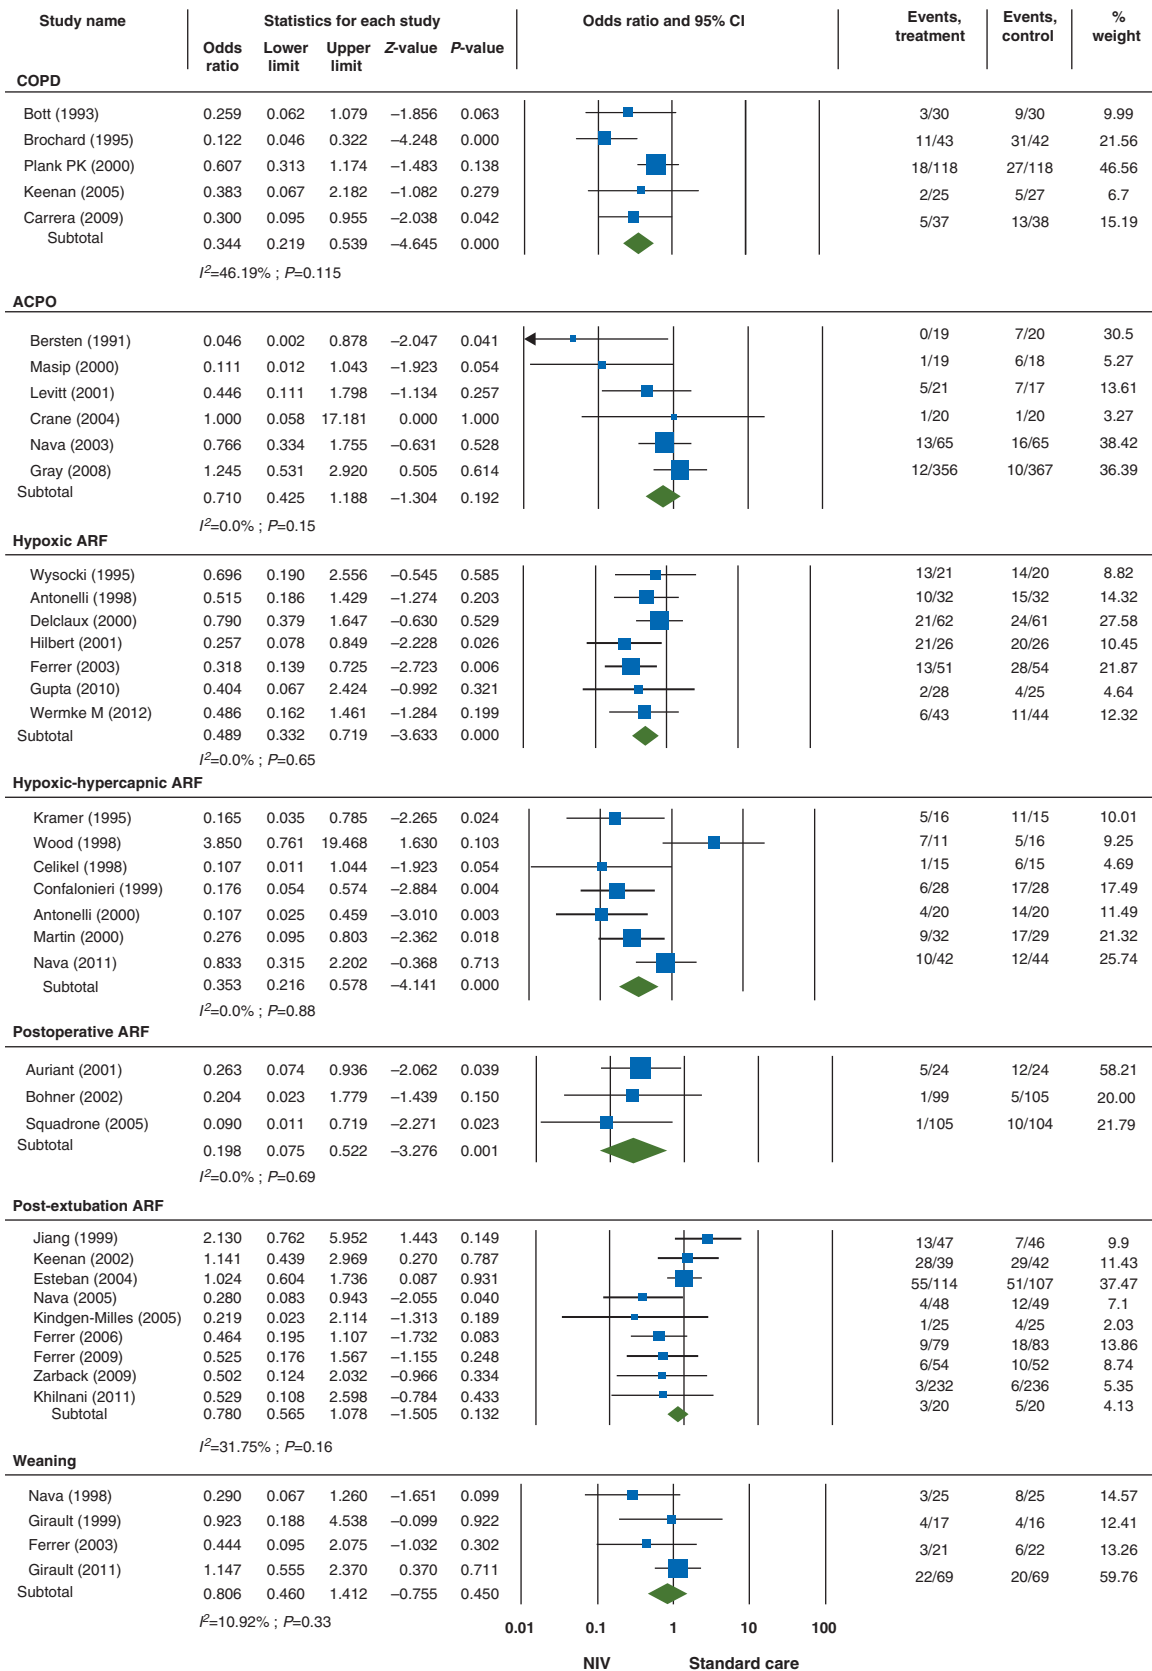

**Fig 2** Failure rates with NIV vs standard medical therapy in ARF. The figure shows the meta-analysis for (top to bottom) COPD, ACPO, hypoxic ARF, hypoxic-hypercapnic ARF, postoperative ARF, post-extubation ARF, and weaning.

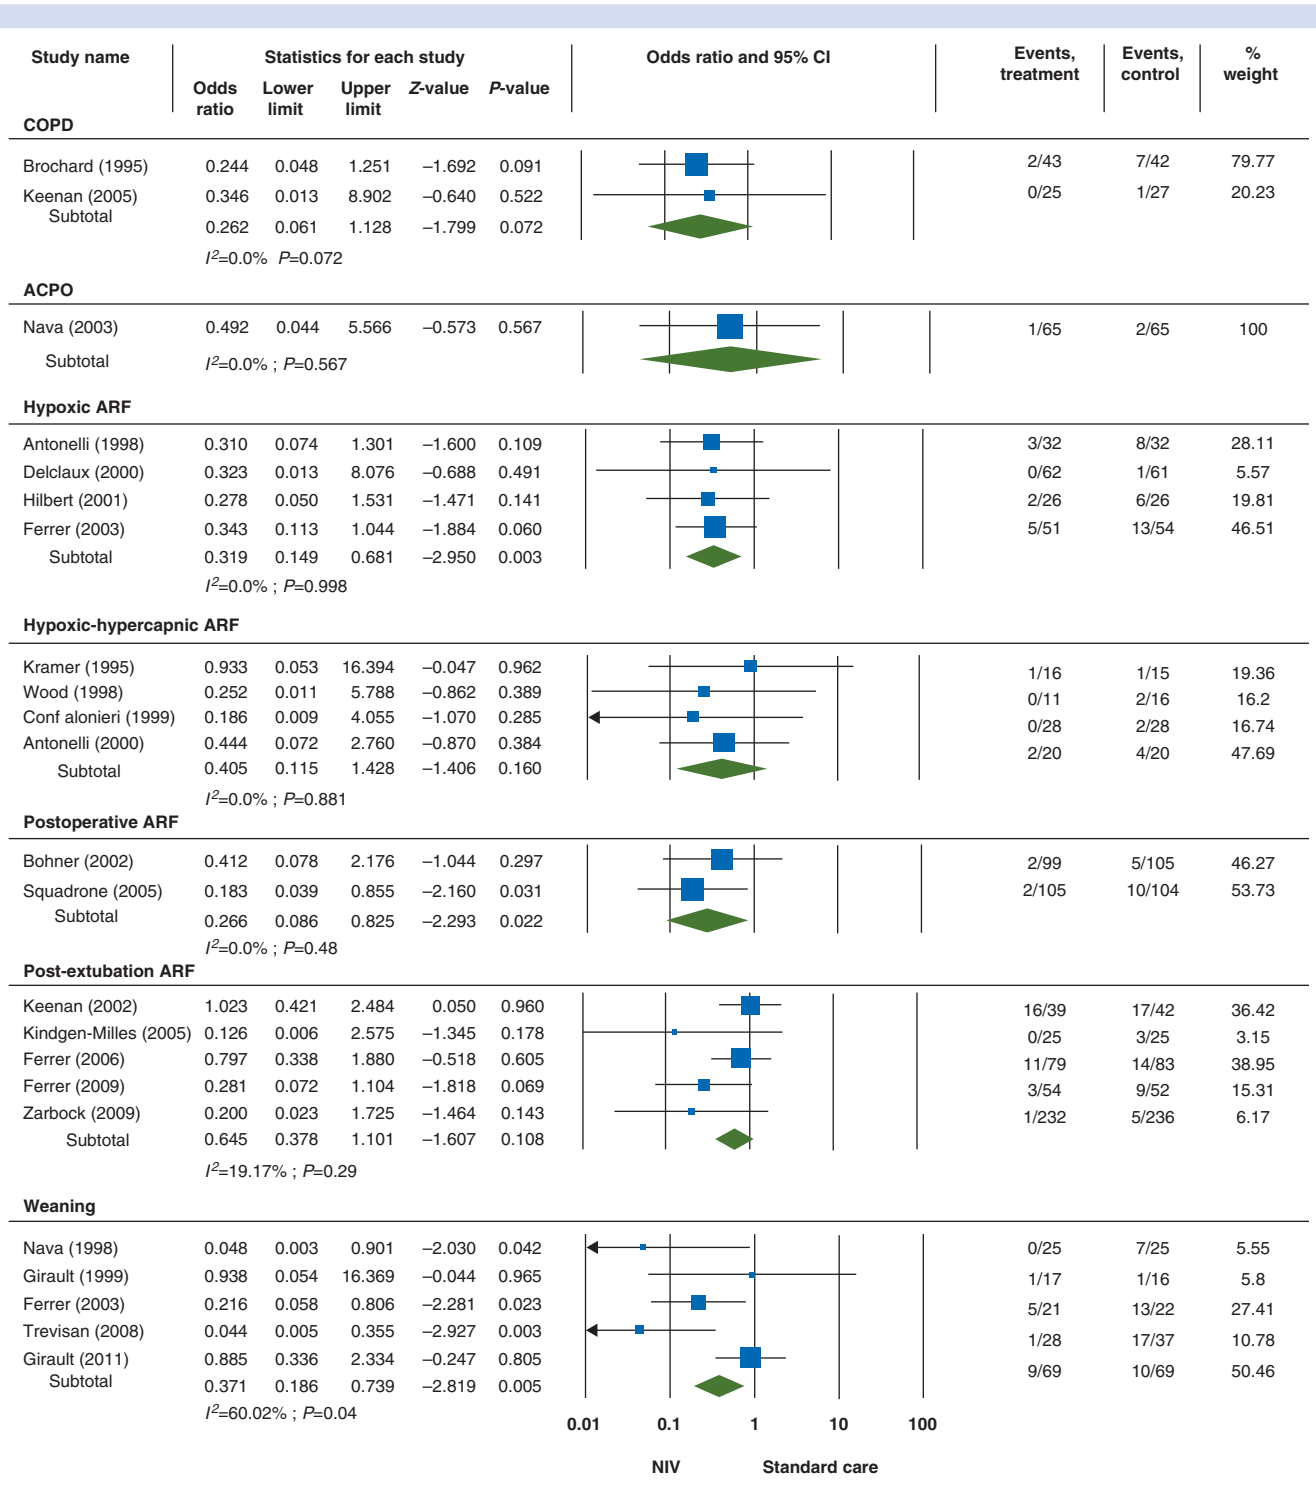

**Fig 3** Pneumonia incidence with NIV vs standard medical therapy in ARF. The figure shows the meta-analysis for (top to bottom) COPD, ACPO, hypoxic ARF, hypoxic-hypercapnic ARF, postoperative ARF, post-extubation ARF, and weaning.

should be carefully considered from the beginning of NIV.<sup>3 8</sup>  
87 142 143

**Airways dryness** During NIV, cool and dry gases alter the tracheobronchial mucosa. By drying secretions and desquamating mucosal epithelium, NIV may cause

mucous plugging and atelectasis.<sup>143</sup> Inspissated secretions predispose to difficult tracheal intubation in the case of NIV failure and may precipitate life-threatening airway obstruction.<sup>144 145</sup>

Without humidification, gas humidity is very low when an ICU ventilator is used (5 mg H<sub>2</sub>O litre<sup>-1</sup>) and humidification



of inspired gases during NIV should target absolute humidity level from 10 mg to above 15 mg H<sub>2</sub>O litre<sup>-1</sup> (with temperatures ranging from 25 to 30°C).<sup>143</sup> However, despite the benefit of gas humidification in terms of comfort and tolerance during long-term NIV in COPD patients, controversy continues on whether supplemental humidification is routinely required during NIV in the acute-care setting.<sup>143</sup> The main types of humidification devices used, heated humidifiers and HMEs, are used for both short-term and long-term humidification during NIV.<sup>143 146</sup> Although numerous clinical evaluations indicate that HME performances are close to those of heated humidifiers during IMV, HME has the potential to increase minute ventilation, mouth occlusion pressure at 0.1 s, PaCO<sub>2</sub>, and work of breathing during PSV in comparison with heated humidifiers.<sup>146 147</sup> This is due to the substantial dead space that HME adds to the ventilatory circuit because of their large internal volume and may be avoided with small dead space HME.<sup>148</sup> During helmet NIV, the high internal gas volume could serve as a 'mixing chamber' between the heated humidified expired gas and the dry medical gas entering the helmet.<sup>149</sup> This could raise the heat and humidity of the medical gas, thus avoiding the need for a heated humidifier.<sup>149</sup> Patients with ARF and healthy individuals exhibited similar abilities to heat and to humidify medical gases and the use of the heated humidifier does not affect the level of patient comfort.<sup>149</sup>

**Gastric insufflation** Aerophagia occurs in most NIV patients and gastric insufflation in 5%<sup>21 25 45 50 52 53 57 62 67 69</sup> to 30–40% of patients.<sup>87</sup> During NIV, the ventilation volume distributes between lungs and stomach depending on respiratory system resistance and lower oesophageal sphincter pressure (~20–25 cm H<sub>2</sub>O in adults) which, in turn, varies with head position, inflation flow rate, inspiratory time, and tidal volume.<sup>150</sup> Large tidal volumes (800–1200 ml), high airway resistance, low respiratory system compliance, and short inspiratory time all increase airway pressure and air entering the stomach.<sup>150</sup> Smaller tidal volumes (~500 ml) are safe and effective as long as oxygen supplementation is used.<sup>150</sup> When gastric insufflation occurs during NIV, gastric distension compresses the lungs, thereby decreasing lung compliance and demanding higher airway ventilation pressure.<sup>150 151</sup> The latter is also associated with increased risk of gastric distension, thus generating a vicious cycle.<sup>150 151</sup> The aberrant respiratory pattern may be exacerbated by bronchoconstriction and bronchial hyperreactivity induced by gastric distention.<sup>151</sup> Although rarely intolerable, gastric insufflation facilitates vomiting and inspiration of gastric contents and can cause serious complications (i.e. pulmonary aspiration, abdominal compartment and hypertension syndromes, stomach rupture, and, exceptionally, death).<sup>3 151</sup>

Theoretically, airway pressures higher than 20–25 cm H<sub>2</sub>O should be avoided. Moreover, considering recent evidence of its efficacy in severe chronic hypercapnic COPD, high pressure NIV should also be carried out in an almost sitting position approximately half an hour after a meal and with routine gastric decompression care.<sup>3 151</sup>

In conclusion, to optimize patient outcome, NIV should be applied by a trained and experienced team, with careful patient selection according to available guidelines and good clinical judgement, taking constantly into account the risk factors for NIV failure. Once begun, patients should be closely monitored in an ICU or step-down unit until adequately stabilized, paying attention not only to vital signs and gas exchange, but also to tolerance, comfort, air leaks, and patient–ventilator interaction. The proper choice of device, an adequate management of ventilatory support, a skilled team, and accurate clinical and instrumental monitoring are crucial to minimize the risk of complications during NIV.<sup>152 153</sup>

## Declaration of interest

None declared.

## Funding

The study was supported by departmental funds only.

## References

- 1 International Consensus Conferences in Intensive Care Medicine. Noninvasive positive pressure ventilation in acute Respiratory failure: Organized jointly by the American Thoracic Society, the European Respiratory Society, the European Society of Intensive Care Medicine, and the Société de Réanimation de Langue Française, and approved by ATS Board of Directors, December 2000. *Am J Respir Crit Care Med* 2001; **163**: 283–91
- 2 Evans TW. International Consensus Conferences in Intensive Care Medicine: non-invasive positive pressure ventilation in acute respiratory failure. Organised jointly by the American Thoracic Society, the European Respiratory Society, the European Society of Intensive Care Medicine, and the Société de Réanimation de Langue Française, and approved by the ATS Board of Directors, December 2000. *Intensive Care Med* 2001; **27**: 166–78
- 3 Mehta S, Hill NS. Noninvasive ventilation. *Am J Respir Crit Care Med* 2001; **163**: 540–77
- 4 Caples SM, Gay PC. Noninvasive positive pressure ventilation in the intensive care unit: a concise review. *Crit Care Med* 2005; **33**: 2651–8
- 5 Garpestad E, Brennan J, Hill NS. Noninvasive ventilation for critical care. *Chest* 2007; **132**: 711–20
- 6 Hill NS, Brennan J, Garpestad E, Nava S. Noninvasive ventilation in acute respiratory failure. *Crit Care Med* 2007; **35**: 2402–7
- 7 Keenan SP, Mehta S. Noninvasive ventilation for patients presenting with acute respiratory failure: the randomized controlled trials. *Respir Care* 2009; **54**: 116–26
- 8 Nava S, Hill N. Non-invasive ventilation in acute respiratory failure. *Lancet* 2009; **374**: 250–9
- 9 Glossop AJ, Shepherd N, Bryden DC, Mills GH. Non-invasive ventilation for weaning, avoiding reintubation after extubation and in the postoperative period: a meta-analysis. *Br J Anaesth* 2012; **109**: 305–14
- 10 Bott J, Carroll MP, Conway JH, et al. Randomised controlled trial of nasal ventilation in acute ventilatory failure due to chronic obstructive airways disease. *Lancet* 1993; **341**: 1555–7

- 11 Brochard L, Mancebo J, Wysocki M, et al. Noninvasive ventilation for acute exacerbations of chronic obstructive pulmonary disease. *N Engl J Med* 1995; **333**: 817–22
- 12 Barbé F, Togoires B, Rubí M, Pons S, Maimó A, Agustí AG. Non-invasive ventilatory support does not facilitate recovery from acute respiratory failure in chronic obstructive pulmonary disease. *Eur Respir J* 1996; **9**: 1240–5
- 13 Plant PK, Owen JL, Elliott MW. Early use of non-invasive ventilation for acute exacerbations of chronic obstructive pulmonary disease on general respiratory wards: a multicentre randomised controlled trial. *Lancet* 2000; **355**: 1931–5
- 14 Conti G, Antonelli M, Navalesi P, et al. Noninvasive vs. conventional mechanical ventilation in patients with chronic obstructive pulmonary disease after failure of medical treatment in the ward: a randomized trial. *Intensive Care Med* 2002; **28**: 1701–7
- 15 Keenan SP, Powers CE, McCormack DG. Noninvasive positive-pressure ventilation in patients with milder chronic obstructive pulmonary disease exacerbations: a randomized controlled trial. *Respir Care* 2005; **50**: 610–6
- 16 Kirakli C, Cerci T, Ucar ZZ, et al. Noninvasive assisted pressure-controlled ventilation: as effective as pressure support ventilation in chronic obstructive pulmonary disease? *Respiration* 2008; **75**: 402–10
- 17 Carrera M, Marin JM, Antón A, et al. A controlled trial of non-invasive ventilation for chronic obstructive pulmonary disease exacerbations. *J Crit Care* 2009; **24**: 473.e7–14
- 18 Maggiore SM, Richard JC, Abroug F, et al. A multicenter, randomized trial of noninvasive ventilation with helium–oxygen mixture in exacerbations of chronic obstructive lung disease. *Crit Care Med* 2010; **38**: 145–51
- 19 Bersten AD, Holt AW, Vedig AE, Skowronski GA, Baggoley CJ. Treatment of severe cardiogenic pulmonary edema with continuous positive airway pressure delivered by face mask. *N Engl J Med* 1991; **325**: 1825–30
- 20 Mehta S, Jay GD, Woolard RH, et al. Randomized, prospective trial of bilevel versus continuous positive airway pressure in acute pulmonary edema. *Crit Care Med* 1997; **25**: 620–8
- 21 Masip J, Betbesé AJ, Páez J, et al. Non-invasive pressure support ventilation versus conventional oxygen therapy in acute cardiogenic pulmonary oedema: a randomised trial. *Lancet* 2000; **356**: 2126–32
- 22 Levitt MA. A prospective, randomized trial of BiPAP in severe acute congestive heart failure. *J Emerg Med* 2001; **21**: 363–9
- 23 Nava S, Carbone G, DiBattista N, et al. Noninvasive ventilation in cardiogenic pulmonary edema: a multicenter randomized trial. *Am J Respir Crit Care Med* 2003; **168**: 1432–7
- 24 Bellone A, Monari A, Cortellaro F, Cortellaro F, Coen D. Myocardial infarction rate in acute pulmonary edema: noninvasive pressure support ventilation versus continuous positive airway pressure. *Crit Care Med* 2004; **32**: 1860–5
- 25 Crane SD, Elliott MW, Gilligan P, Richards K, Gray AJ. Randomised controlled comparison of continuous positive airways pressure, bilevel non-invasive ventilation, and standard treatment in emergency department patients with acute cardiogenic pulmonary oedema. *Emerg Med J* 2004; **21**: 155–61
- 26 Bellone A, Vettorello M, Monari A, Cortellaro F, Coen D. Non-invasive pressure support ventilation vs. continuous positive airway pressure in acute hypercapnic pulmonary edema. *Intensive Care Med* 2005; **31**: 807–11
- 27 Moritz F, Brousse B, Gellée B, et al. Continuous positive airway pressure versus bilevel noninvasive ventilation in acute cardiogenic pulmonary edema: a randomized multicenter trial. *Ann Emerg Med* 2007; **50**: 666–75
- 28 Ferrari G, Olliveri F, De Filippi G, et al. Noninvasive positive airway pressure and risk of myocardial infarction in acute cardiogenic pulmonary edema: continuous positive airway pressure vs. non-invasive positive pressure ventilation. *Chest* 2007; **132**: 1804–9
- 29 Gray A, Goodacre S, Newby DE, Masson M, Sampson F, Nicholl J. Noninvasive ventilation in acute cardiogenic pulmonary edema. *N Engl J Med* 2008; **359**: 142–51
- 30 Rusterholtz T, Bollaert PE, Feissel M, et al. Continuous positive airway pressure vs. proportional assist ventilation for non-invasive ventilation in acute cardiogenic pulmonary edema. *Intensive Care Med* 2008; **34**: 840–6
- 31 Ferrari G, Milan A, Groff P, et al. Continuous positive airway pressure vs. pressure support ventilation in acute cardiogenic pulmonary edema: a randomized trial. *J Emerg Med* 2010; **39**: 676–84
- 32 Nouira S, Boukef R, Boudia W, et al. Non-invasive pressure support ventilation and CPAP in cardiogenic pulmonary edema: a multicenter randomized study in the emergency department. *Intensive Care Med* 2011; **37**: 249–56
- 33 Wysocki M, Tric L, Wolff MA, Millet H, Herman B. Noninvasive pressure support ventilation in patients with acute respiratory failure. A randomized comparison with conventional therapy. *Chest* 1995; **107**: 761–8
- 34 Antonelli M, Conti G, Rocco M, et al. A comparison of noninvasive positive-pressure ventilation and conventional mechanical ventilation in patients with acute respiratory failure. *N Engl J Med* 1998; **339**: 429–35
- 35 Delclaux C, L'Her E, Alberti C, et al. Treatment of acute hypoxemic nonhypercapnic respiratory insufficiency with continuous positive airway pressure delivered by a face mask: a randomized controlled trial. *J Am Med Assoc* 2000; **284**: 2352–60
- 36 Hilbert G, Gruson D, Vargas F, et al. Noninvasive ventilation in immunosuppressed patients with pulmonary infiltrates, fever, and acute respiratory failure. *N Engl J Med* 2001; **344**: 481–7
- 37 Ferrer M, Esquinas A, Leon M, Gonzalez G, Alarcon A, Torres A. Noninvasive ventilation in severe hypoxemic respiratory failure: a randomized clinical trial. *Am J Respir Crit Care Med* 2003; **168**: 1438–44
- 38 Cosentini R, Brambilla AM, Aliberti S, et al. Helmet continuous positive airway pressure vs. oxygen therapy to improve oxygenation in community-acquired pneumonia: a randomized, controlled trial. *Chest* 2010; **138**: 114–20
- 39 Fartoukh M, Lefort Y, Habibi A, et al. Early intermittent noninvasive ventilation for acute chest syndrome in adults with sickle cell disease: a pilot study. *Intensive Care Med* 2010; **36**: 1355–62
- 40 Gupta D, Nath A, Agarwal R, Behera D. A prospective randomized controlled trial on the efficacy of noninvasive ventilation in severe acute asthma. *Respir Care* 2010; **55**: 536–43
- 41 Wermke M, Schiemanck S, Höffken G, et al. Respiratory failure in patients undergoing allogeneic hematopoietic SCT—a randomized trial on early non-invasive ventilation based on standard care hematology wards. *Bone Marrow Transplant* 2012; **47**: 574–80
- 42 Kramer N, Meyer TJ, Meharg J, Cece RD, Hill NS. Randomized, prospective trial of noninvasive positive pressure ventilation in acute respiratory failure. *Am J Respir Crit Care Med* 1995; **151**: 1799–806
- 43 Wood KA, Lewis L, Von Harz B, Kollef MH. The use of noninvasive positive pressure ventilation in the emergency department: results of a randomized clinical trial. *Chest* 1998; **113**: 1339–46

- 44 Celikel T, Sungur M, Ceyhan B, Karakurt S. Comparison of non-invasive positive pressure ventilation with standard medical therapy in hypercapnic acute respiratory failure. *Chest* 1998; **114**: 1636–42
- 45 Confalonieri M, Potena A, Carbone G, Porta RD, Tolley EA, Meduri GU. Acute respiratory failure in patients with severe community-acquired pneumonia. A prospective randomized evaluation of noninvasive ventilation. *Am J Respir Crit Care Med* 1999; **160**: 1585–91
- 46 Antonelli M, Conti G, Bufi M, et al. Noninvasive ventilation for treatment of acute respiratory failure in patients undergoing solid organ transplantation: a randomized trial. *J Am Med Assoc* 2000; **283**: 235–41
- 47 Martin TJ, Hovis JD, Costantino JP, et al. A randomized, prospective evaluation of noninvasive ventilation for acute respiratory failure. *Am J Respir Crit Care Med* 2000; **161**: 807–13
- 48 Gay PC, Hess DR, Hill NS. Noninvasive proportional assist ventilation for acute respiratory insufficiency. Comparison with pressure support ventilation. *Am J Respir Crit Care Med* 2001; **164**: 1606–11
- 49 Kwok H, McCormack J, Cece R, Houtchens J, Hill NS. Controlled trial of oronasal versus nasal mask ventilation in the treatment of acute respiratory failure. *Crit Care Med* 2003; **31**: 468–73
- 50 Fernández-Vivas M, Caturla-Such J, González de la Rosa J, Acosta-Escribano J, Alvarez-Sánchez B, Cánovas-Robles J. Non-invasive pressure support versus proportional assist ventilation in acute respiratory failure. *Intensive Care Med* 2003; **29**: 1126–33
- 51 Honrubia T, García López FJ, Franco N. Noninvasive vs. conventional mechanical ventilation in acute respiratory failure: a multicenter, randomized controlled trial. *Chest* 2005; **128**: 3916–24
- 52 Cuvelier A, Pujol W, Pramil S, Molano LC, Viacroze C, Muir JF. Cephalic versus oronasal mask for noninvasive ventilation in acute hypercapnic respiratory failure. *Intensive Care Med* 2007; **35**: 519–26
- 53 Girault C, Briel A, Benichou J, et al. Interface strategy during noninvasive positive pressure ventilation for hypercapnic acute respiratory failure. *Crit Care Med* 2009; **37**: 124–31
- 54 Nava S, Grassi M, Fanfulla F, et al. Non-invasive ventilation in elderly patients with acute hypercapnic respiratory failure: a randomised controlled trial. *Age Ageing* 2011; **40**: 444–50
- 55 Auriant I, Jallot A, Hervé P, et al. Noninvasive ventilation reduces mortality in acute respiratory failure following lung resection. *Am J Respir Crit Care Med* 2001; **164**: 1231–5
- 56 Böhner H, Kindgen-Milles D, Grust A, et al. Prophylactic nasal continuous positive airway pressure after major vascular surgery: results of a prospective randomized trial. *Langenbecks Arch Surg* 2002; **387**: 21–6
- 57 Squadrone V, Coha M, Cerutti E. Continuous positive airway pressure for treatment of postoperative hypoxemia: a randomized controlled trial. *J Am Med Assoc* 2005; **293**: 589–95
- 58 Jiang JS, Kao SJ, Wang SN. Effect of early application of biphasic positive airway pressure on the outcome of extubation in ventilator weaning. *Respirology* 1999; **4**: 161–5
- 59 Keenan SP, Powers C, McCormack DG, Block G. Noninvasive positive-pressure ventilation for postextubation respiratory distress: a randomized controlled trial. *J Am Med Assoc* 2002; **287**: 3238–44
- 60 Esteban A, Frutos-Vivar F, Ferguson ND, et al. Noninvasive positive-pressure ventilation for respiratory failure after extubation. *N Engl J Med* 2004; **350**: 2452–60
- 61 Nava S, Gregoretti C, Fanfulla F, et al. Noninvasive ventilation to prevent respiratory failure after extubation in high-risk patients. *Crit Care Med* 2005; **33**: 2465–70
- 62 Kindgen-Milles D, Müller E, Buhl R, et al. Nasal-continuous positive airway pressure reduces pulmonary morbidity and length of hospital stay following thoracoabdominal aortic surgery. *Chest* 2005; **128**: 821–8
- 63 Ferrer M, Valencia M, Nicolas JM, Bernadich O, Badia JR, Torres A. Early noninvasive ventilation averts extubation failure in patients at risk: a randomized trial. *Am J Respir Crit Care Med* 2006; **173**: 164–70
- 64 Ferrer M, Sellarés J, Valencia M, et al. Non-invasive ventilation after extubation in hypercapnic patients with chronic respiratory disorders: randomised controlled trial. *Lancet* 2009; **374**: 1082–8
- 65 Zarbock A, Mueller E, Netzer S, Gabriel A, Feindt P, Kindgen-Milles D. Prophylactic nasal continuous positive airway pressure following cardiac surgery protects from post-operative pulmonary complications: a prospective, randomized, controlled trial in 500 patients. *Chest* 2009; **135**: 1252–9
- 66 Khilnani GC, Galle AD, Hadda V, Sharma SK. Non-invasive ventilation after extubation in patients with chronic obstructive airways disease: a randomised controlled trial. *Anaesth Intensive Care* 2011; **39**: 217–23
- 67 Nava S, Ambrosino N, Clini E, et al. Noninvasive mechanical ventilation in the weaning of patients with respiratory failure due to chronic obstructive pulmonary disease. A randomized, controlled trial. *Ann Intern Med* 1998; **128**: 721–8
- 68 Girault C, Daudenthun I, Chevron V, Tamion F, Leroy J, Bonmarchand G. Noninvasive ventilation as a systematic extubation and weaning technique in acute-on-chronic respiratory failure: a prospective, randomized controlled study. *Am J Respir Crit Care Med* 1999; **160**: 86–92
- 69 Ferrer M, Esquinas A, Arancibia F, et al. Noninvasive ventilation during persistent weaning failure: a randomized controlled trial. *Am J Respir Crit Care Med* 2003; **168**: 70–6
- 70 Trevisan CE, Vieira SR. Research Group in Mechanical Ventilation Weaning: noninvasive mechanical ventilation may be useful in treating patients who fail weaning from invasive mechanical ventilation: a randomized clinical trial. *Crit Care* 2008; **12**: R51
- 71 Girault C, Bubenheim M, Abroug F, et al. Noninvasive ventilation and weaning in patients with chronic hypercapnic respiratory failure: a randomized multicenter trial. *Am J Respir Crit Care Med* 2011; **184**: 672–9
- 72 Antonelli M, Pennisi MA, Pelosi P, et al. Noninvasive positive pressure ventilation using a helmet in patients with acute exacerbation of chronic obstructive pulmonary disease: a feasibility study. *Anesthesiology* 2004; **100**: 16–24
- 73 Confalonieri M, Calderini E, Terraciano S, et al. Noninvasive ventilation for treating acute respiratory failure in AIDS patients with *Pneumocystis carinii* pneumonia. *Intensive Care Med* 2002; **28**: 1233–8
- 74 Ram FS, Wellington S, Rowe B, Wedzicha JA. Non-invasive positive pressure ventilation for treatment of respiratory failure due to severe acute exacerbations of asthma. *Cochrane Database Syst Rev* 2005; CD004360
- 75 Medoff BD. Invasive and noninvasive ventilation in patients with asthma. *Respir Care* 2008; **53**: 740–8
- 76 Carron M, Freo U, Zorzi M, Ori C. Predictors of failure of non-invasive ventilation in patients with severe community-acquired pneumonia. *J Crit Care* 2010; **25**: 540



- 77 Jolliet P, Abajo B, Pasquina P, Chevrolet JC. Non-invasive pressure support ventilation in severe community-acquired pneumonia. *Intensive Care Med* 2001; **27**: 812–21
- 78 Domenighetti G, Gayer R, Gentilini R. Noninvasive pressure support ventilation in non-COPD patients with acute cardiogenic pulmonary edema and severe community-acquired pneumonia: acute effects and outcome. *Intensive Care Med* 2002; **28**: 1226–32
- 79 Antonelli M, Conti G, Moro ML, et al. Predictors of failure of non-invasive positive pressure ventilation in patients with acute hypoxemic respiratory failure: a multi-center study. *Intensive Care Med* 2001; **27**: 1718–28
- 80 Antonelli M, Conti G, Pelosi P, et al. New treatment of acute hypoxemic respiratory failure: noninvasive pressure support ventilation delivered by helmet—a pilot controlled trial. *Crit Care Med* 2002; **30**: 602–8
- 81 Antonelli M, Conti G, Esquinas A, et al. A multiple-center survey on the use in clinical practice of noninvasive ventilation as a first-line intervention for acute respiratory distress syndrome. *Crit Care Med* 2007; **35**: 18–25
- 82 Conti G, Cavaliere F, Costa R, et al. Noninvasive positive-pressure ventilation with different interfaces in patients with respiratory failure after abdominal surgery: a matched-control study. *Respir Care* 2007; **52**: 1463–71
- 83 BaHammam A. Acute ventilatory failure complicating obesity hypoventilation: update on a ‘critical care syndrome’. *Curr Opin Pulm Med* 2010; **16**: 543–51
- 84 Girou E, Schortgen F, Delclaux C. Association of noninvasive ventilation with nosocomial infections and survival in critically ill patients. *J Am Med Assoc* 2000; **284**: 2361–7
- 85 Hess DR. Noninvasive positive-pressure ventilation and ventilator-associated pneumonia. *Respir Care* 2005; **50**: 924–9
- 86 Kohlenberg A, Schwab F, Behnke M, Geffers C, Gastmeier P. Pneumonia associated with invasive and noninvasive ventilation: an analysis of the German nosocomial infection surveillance system database. *Intensive Care Med* 2010; **36**: 971–8
- 87 Gay PC. Complications of noninvasive ventilation in acute care. *Respir Care* 2009; **54**: 246–57
- 88 Carron M, Gagliardi G, Michielan F, Freo U, Ori C. Occurrence of pneumothorax during noninvasive positive pressure ventilation through a helmet. *J Clin Anesth* 2007; **19**: 632–5
- 89 Haworth CS, Dodd ME, Atkins M, Woodcock AA, Webb AK. Pneumothorax in adults with cystic fibrosis dependent on nasal intermittent positive pressure ventilation (NIPPV): a management dilemma. *Thorax* 2000; **55**: 620–2
- 90 Valipour A, Schneider F, Kössler W, Saliba S, Burghuber OC. Heart rate variability and spontaneous baroreflex sequences in supine healthy volunteers subjected to nasal positive airway pressure. *J Appl Physiol* 2005; **99**: 2137–43
- 91 Montner PK, Greene ER, Murata GH, Stark DM, Timms M, Chick TW. Hemodynamic effects of nasal and face mask continuous positive airway pressure. *Am J Respir Crit Care Med* 1994; **149**: 1614–8
- 92 Jardin F, Farcot JC, Boisante L, Curien N, Margairaz A, Bourdarias JP. Influence of positive end-expiratory pressure on left ventricular performance. *N Engl J Med* 1981; **304**: 387–92
- 93 Leithner C, Podolsky A, Globits S, et al. Magnetic resonance imaging of the heart during positive end-expiratory pressure ventilation in normal subjects. *Crit Care Med* 1994; **22**: 426–32
- 94 Leech JA, Ascah KJ. Hemodynamic effects of nasal CPAP examined by Doppler echocardiography. *Chest* 1991; **99**: 323–6
- 95 Maestroni A, Aliberti S, Amir O, et al. Acute effects of positive end-expiratory pressure on left ventricle diastolic function in healthy subjects. *Intern Emerg Med* 2009; **4**: 249–54
- 96 Vargas F, Thille A, Lyazidi A, Campo FR, Brochard L. Helmet with specific settings versus facemask for noninvasive ventilation. *Crit Care Med* 2009; **37**: 1921–8
- 97 Summers RL, Patch J, Kolb JC. Effect of the initiation of noninvasive bi-level positive airway pressure on haemodynamic stability. *Eur J Emerg Med* 2002; **9**: 37–41
- 98 Ambrosino N, Nava S, Torbicki A, et al. Haemodynamic effects of pressure support and PEEP ventilation by nasal route in patients with stable chronic obstructive pulmonary disease. *Thorax* 1993; **48**: 523–8
- 99 Diaz O, Iglesia R, Ferrer M, et al. Effects of noninvasive ventilation on pulmonary gas exchange and hemodynamics during acute hypercapnic exacerbations of chronic obstructive pulmonary disease. *Am J Respir Crit Care Med* 1997; **156**: 1840–5
- 100 Confalonieri M, Gazzaniga P, Gandola L, et al. Haemodynamic response during initiation of non-invasive positive pressure ventilation in COPD patients with acute ventilatory failure. *Respir Med* 1998; **92**: 331–7
- 101 Kilger E, Briegel J, Haller M, et al. Effects of noninvasive positive pressure ventilatory support in non-COPD patients with acute respiratory insufficiency after early extubation. *Intensive Care Med* 1999; **25**: 1374–80
- 102 Baratz DM, Westbrook PR, Shah PK, Mohsenifar Z. Effect of nasal continuous positive airway pressure on cardiac output and oxygen delivery in patients with congestive heart failure. *Chest* 1992; **102**: 1397–401
- 103 Chadda K, Annane D, Hart N, Gajdos P, Raphaël JC, Lofaso F. Cardiac and respiratory effects of continuous positive airway pressure and noninvasive ventilation in acute cardiac pulmonary edema. *Crit Care Med* 2002; **30**: 2457–61
- 104 Guarracino F, Ambrosino N. Non invasive ventilation in cardio-surgical patients. *Minerva Anestesiol* 2011; **77**: 734–41
- 105 Tonnelier JM, Prat G, Nowak E, et al. Noninvasive continuous positive airway pressure ventilation using a new helmet interface: a case-control prospective pilot study. *Intensive Care Med* 2003; **29**: 2077–80
- 106 Philip-Joët FF, Paganelli FF, Dutau HL, Saadjian AY. Hemodynamic effects of bilevel nasal positive airway pressure ventilation in patients with heart failure. *Respiration* 1999; **66**: 136–43
- 107 McDonagh PF. The microvascular pathophysiology of chronic venous insufficiency. *Yale J Biol Med* 1993; **66**: 27–36
- 108 Schettino GP, Chatmongkolchart S, Hess DR, Kacmarek RM. Position of exhalation port and mask design affect CO<sub>2</sub> rebreathing during noninvasive positive pressure ventilation. *Crit Care Med* 2003; **31**: 2178–82
- 109 Szkulmowski Z, Belkhouja K, Le QH. Bilevel positive airway pressure ventilation: factors influencing carbon dioxide rebreathing. *Intensive Care Med* 2010; **36**: 688–91
- 110 Taccone P, Hess D, Caironi P, Bigatello LM. Continuous positive airway pressure delivered with a ‘helmet’: effects on carbon dioxide rebreathing. *Crit Care Med* 2004; **32**: 2090–6
- 111 Racca F, Appendini L, Gregoretti C, et al. Effectiveness of mask and helmet interfaces to deliver noninvasive ventilation in a human model of resistive breathing. *J Appl Physiol* 2005; **99**: 1262–71
- 112 Fodil R, Lellouche F, Mancebo J. Comparison of patient-ventilator interfaces based on their computerized effective dead space. *Intensive Care Med* 2011; **37**: 257–62

- 113 Patroniti N, Foti G, Manfio A, Coppo A, Bellani G, Pesenti A. Head helmet versus face mask for non-invasive continuous positive airway pressure: a physiological study. *Intensive Care Med* 2003; **29**: 1680–7
- 114 Gonzalez J, Sharshar T, Hart N, Chadda K, Raphaël JC, Lofaso F. Air leaks during mechanical ventilation as a cause of persistent hypercapnia in neuromuscular disorders. *Intensive Care Med* 2003; **29**: 596–602
- 115 Gregoretti C, Confalonieri M, Navalesi P, et al. Evaluation of patient skin breakdown and comfort with a new face mask for non-invasive ventilation: a multi-center study. *Intensive Care Med* 2002; **28**: 278–84
- 116 Chiumello D, Pelosi P, Carlesso E, et al. Noninvasive positive pressure ventilation delivered by helmet vs. standard face mask. *Intensive Care Med* 2003; **29**: 1671–9
- 117 Hill NS. Noninvasive interfaces: should we go to helmets? *Crit Care Med* 2004; **32**: 2162–3
- 118 Hess DR. How to initiate a noninvasive ventilation program: bringing the evidence to the bedside. *Respir Care* 2009; **54**: 232–43
- 119 Agarwal R, Aggarwal AN, Gupta D. Role of noninvasive ventilation in acute lung injury/acute respiratory distress syndrome: a proportion meta-analysis. *Respir Care* 2010; **55**: 1653–60
- 120 Hill NS. Saving face: better interfaces for noninvasive ventilation. *Intensive Care Med* 2002; **28**: 227–9
- 121 Fraticelli AT, Lellouche F, L'her E, Taillé S, Mancebo J, Brochard L. Physiological effects of different interfaces during noninvasive ventilation for acute respiratory failure. *Crit Care Med* 2009; **37**: 939–45
- 122 Principi T, Pantanetti S, Catani F, et al. Noninvasive continuous positive airway pressure delivered by helmet in hematological malignancy patients with hypoxemic acute respiratory failure. *Intensive Care Med* 2004; **30**: 147–50
- 123 Rocco M, Dell'Utri D, Morelli A, et al. Noninvasive ventilation by helmet or face mask in immunocompromised patients: a case-control study. *Chest* 2004; **126**: 1508–15
- 124 Navalesi P, Costa R, Ceriana P, et al. Non-invasive ventilation in chronic obstructive pulmonary disease patients: helmet versus facial mask. *Intensive Care Med* 2007; **33**: 74–81
- 125 Hess DR. The evidence for noninvasive positive-pressure ventilation in the care of patients in acute respiratory failure: a systematic review of the literature. *Respir Care* 2004; **49**: 810–29
- 126 Chiumello D, Pelosi P, Croci M, Bigatello LM, Gattinoni L. The effects of pressurization rate on breathing pattern, work of breathing, gas exchange and patient comfort in pressure support ventilation. *Eur Respir J* 2001; **18**: 107–14
- 127 Vitacca M, Bianchi L, Zanotti E, et al. Assessment of physiologic variables and subjective comfort under different levels of pressure support ventilation. *Chest* 2004; **126**: 851–9
- 128 Rocco M, Conti G, Alessandri E, et al. Rescue treatment for non-invasive ventilation failure due to interface intolerance with remifentanyl analgosedation: a pilot study. *Intensive Care Med* 2010; **36**: 2060–5
- 129 Clouzeau B, Bui HN, Vargas F, et al. Target-controlled infusion of propofol for sedation in patients with non-invasive ventilation failure due to low tolerance: a preliminary study. *Intensive Care Med* 2010; **36**: 1675–80
- 130 Munckton K, Ho KM, Dobb GJ, Das-Gupta M, Webb SA. The pressure effects of facemasks during noninvasive ventilation: a volunteer study. *Anaesthesia* 2007; **62**: 1126–31
- 131 Racca F, Appendini L, Berta G, et al. Helmet ventilation for acute respiratory failure and nasal skin breakdown in neuromuscular disorders. *Anesth Analg* 2009; **109**: 164–7
- 132 Cavaliere F, Conti G, Costa R, Proietti R, Sciuto A, Masieri S. Noise exposure during noninvasive ventilation with a helmet, a nasal mask, and a facial mask. *Intensive Care Med* 2004; **30**: 1755–60
- 133 Cavaliere F, Conti G, Costa R, et al. Exposure to noise during continuous positive airway pressure: influence of interfaces and delivery systems. *Acta Anaesthesiol Scand* 2008; **52**: 52–6
- 134 Gabor JY, Cooper AB, Crombach SA, Lee B, Kadikar N, Bettger HE. Contribution of the intensive care unit environment to sleep disruption in mechanically ventilated patients and healthy subjects. *Am J Respir Crit Care Med* 2003; **167**: 708–15
- 135 Spahija J, de Marchie M, Albert M, et al. Patient-ventilator interaction during pressure support ventilation and neurally adjusted ventilatory assist. *Crit Care Med* 2010; **38**: 518–26
- 136 Costa R, Navalesi P, Spinazzola G, et al. Influence of ventilator settings on patient-ventilator synchrony during pressure support ventilation with different interfaces. *Intensive Care Med* 2010; **36**: 1363–70
- 137 Vignaux L, Vargas F, Roeseler J, et al. Patient-ventilator asynchrony during non-invasive ventilation for acute respiratory failure: a multicenter study. *Intensive Care Med* 2009; **35**: 840–6
- 138 Thille AW, Cabello B, Galia F, Lyazidi A, Brochard L. Reduction of patient-ventilator asynchrony by reducing tidal volume during pressure-support ventilation. *Intensive Care Med* 2008; **34**: 1477–86
- 139 Kondili E, Xirouchaki N, Georgopoulos D. Modulation and treatment of patient-ventilator dyssynchrony. *Curr Opin Crit Care* 2007; **13**: 84–9
- 140 Miyoshi E, Fujino Y, Uchiyama A, Mashimo T, Nishimura M. Effects of gas leak on triggering function, humidification, and inspiratory oxygen fraction during noninvasive positive airway pressure ventilation. *Chest* 2005; **128**: 3691–8
- 141 Storre JH, Bohm P, Dreher M, Windisch W. Clinical impact of leak compensation during non-invasive ventilation. *Respir Med* 2009; **103**: 1477–83
- 142 Richards GN, Cistulli PA, Ungar RG, Berthon-Jones M, Sullivan CE. Mouth leak with nasal continuous positive airway pressure increases nasal airway resistance. *Am J Respir Crit Care Med* 1996; **154**: 182–6
- 143 Branson RD, Gentile MA. Is humidification always necessary during noninvasive ventilation in the hospital? *Respir Care* 2010; **55**: 209–16
- 144 Esquinas A, Nava S, Scala R, et al. Humidification and difficult endotracheal intubation in failure of noninvasive mechanical ventilation. Preliminary results. *Am J Respir Crit Care Med* 2008; **177**: A644
- 145 Wood KE, Flaten AL, Backes WJ. Inspissated secretions: a life-threatening complication of prolonged noninvasive ventilation. *Respir Care* 2000; **45**: 491–3
- 146 Lellouche F, Maggiore SM, Lyazidi A, et al. Water content of delivered gases during non-invasive ventilation in healthy subjects. *Intensive Care Med* 2009; **35**: 987–95
- 147 Jaber S, Chanques G, Matecki S, et al. Comparison of the effects of heat and moisture exchangers and heated humidifiers on ventilation and gas exchange during non-invasive ventilation. *Intensive Care Med* 2002; **28**: 1590–4
- 148 Boyer A, Vargas F, Hilbert G, et al. Small dead space heat and moisture exchangers do not impede gas exchange during non-invasive ventilation: a comparison with a heated humidifier. *Intensive Care Med* 2010; **36**: 1348–54
- 149 Chiumello D, Chierichetti M, Tallarini F, et al. Effect of a heated humidifier during continuous positive airway pressure delivered by a helmet. *Crit Care* 2008; **12**: R55



- 150 De Keulenaer BL, De Backer A, Schepens DR, Daelemans R, Wilmer A, Malbrain ML. Abdominal compartment syndrome related to noninvasive ventilation. *Intensive Care Med* 2003; **29**: 1177–81
- 151 Luria O, Reshef L, Barnea O. Analysis of non-invasive ventilation effects on gastric inflation using a non-linear mathematical model. *Resuscitation* 2006; **71**: 358–64
- 152 Guérin C, Girard R, Chemorin C. Facial mask noninvasive mechanical ventilation reduces the incidence of nosocomial pneumonia. A prospective epidemiological survey from a single ICU. *Intensive Care Med* 1997; **23**: 1024–32
- 153 Dellweg D, Hochrainer D, Klauke M, Kerl J, Eiger G, Kohler D. Determinants of skin contact pressure formation during non-invasive ventilation. *J Biomech* 2010; **43**: 652–7

Handling editor: R. P. Mahajan
